# Supplementary material for: Inhibition of mTORC1 by ER stress impairs neonatal β-cell expansion and predisposes to diabetes in the Akita mouse
Source: eLife journal article supplement (doi:10.7554/elife.38472), 2018-11-09
Supplement: figures [file elife-38472-figures-v2.pdf]

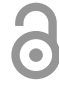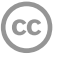

---

## Figures and figure supplements

Inhibition of mTORC1 by ER stress impairs neonatal  $\beta$ -cell expansion and predisposes to diabetes in the *Akita* mouse

**Yael Riahi et al**

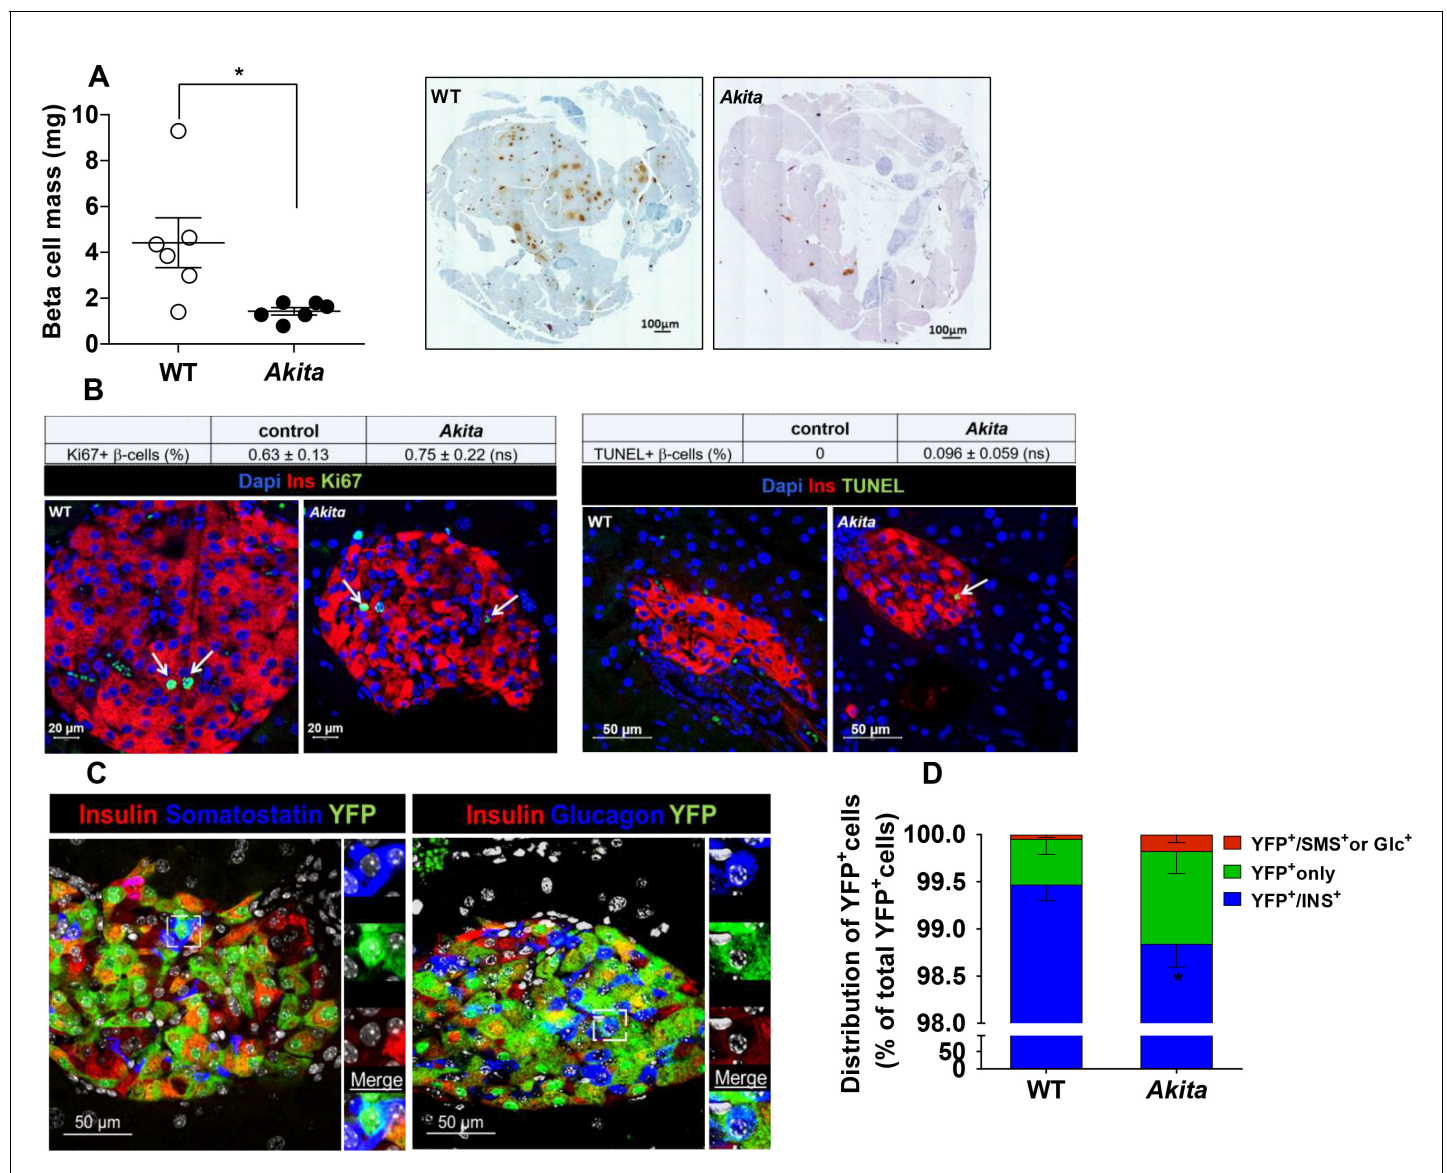

**Figure 1.**  $\beta$ -Cell mass, turnover and differentiation in adult Akita mice. Analyses were performed on 2- to 3-month-old Akita mice and age-matched controls. (a)  $\beta$ -cell mass ( $n = 6$  in each group); (b)  $\beta$ -cell proliferation and apoptosis assessed by staining for insulin and Ki67 ( $n = 6$ –7 mice in each group; a total of 4909 wild type (WT) and 2523 Akita  $\beta$ -cells were quantified) or TUNEL ( $n = 4$ –5 mice in each group; 2592 WT and 1754 Akita  $\beta$ -cells). The percentage of Ki67<sup>+</sup> and TUNEL<sup>+</sup>  $\beta$ -cells is shown in the table above; (c–d)  $\beta$ -cell differentiation was assessed by lineage tracing. Wild-type and Akita mice were crossed with *RIP-Cre:Rosa26-Yfp* reporter mice; (c) pancreatic sections of Akita mice were immunostained for insulin and somatostatin or glucagon. Lineage-traced  $\beta$ -cells (YFP<sup>+</sup>) expressing somatostatin or glucagon is shown in squares and zoomed in; (d) quantification of insulin-expressing  $\beta$ -cells (percentage of insulin<sup>+</sup>/YFP<sup>+</sup> cells), insulin-degranulated  $\beta$ -cells (percentage of insulin<sup>+</sup>/YFP<sup>+</sup> cells) and of cells with misexpression of somatostatin or glucagon (percentage of somatostatin<sup>+</sup> or glucagon<sup>+</sup>/YFP<sup>+</sup> cells) in WT and Akita mice is shown; \* $p < 0.05$ .

DOI: <https://doi.org/10.7554/eLife.38472.003>

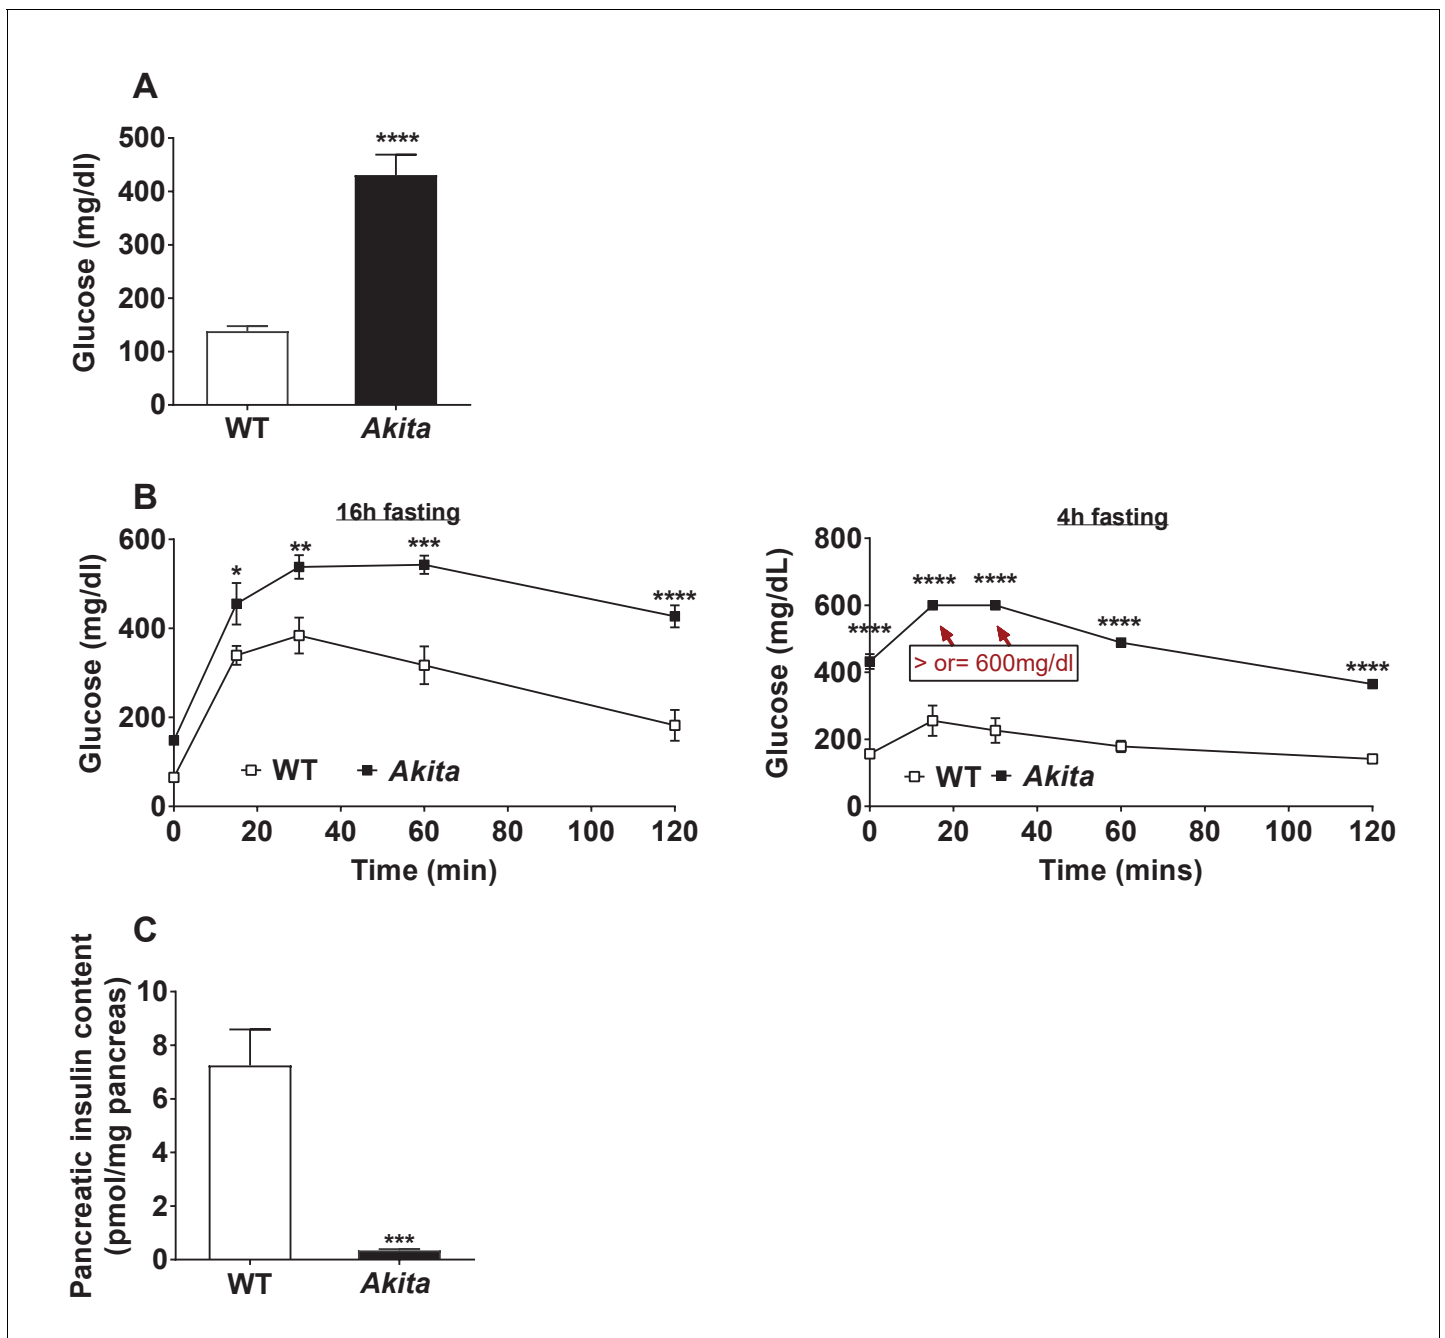

**Figure 1—figure supplement 1.** Glycemia and  $\beta$ -cell function in adult Akita and control mice. (a) Fed blood glucose ( $n = 11$ – $15$  in each group); (b) IPGTT- glucose ( $1.5$  g/kg) was injected intraperitoneally after an overnight or  $4$  hr fast ( $n = 4$ – $5$  in each group); (c) pancreatic insulin content analyzed by ELISA on whole pancreas extracts ( $n = 4$ – $5$  in each group). \* $p < 0.05$ , \*\* $p < 0.01$ , \*\*\* $p < 0.001$ , \*\*\*\* $p < 0.0001$ .

DOI: <https://doi.org/10.7554/eLife.38472.004>

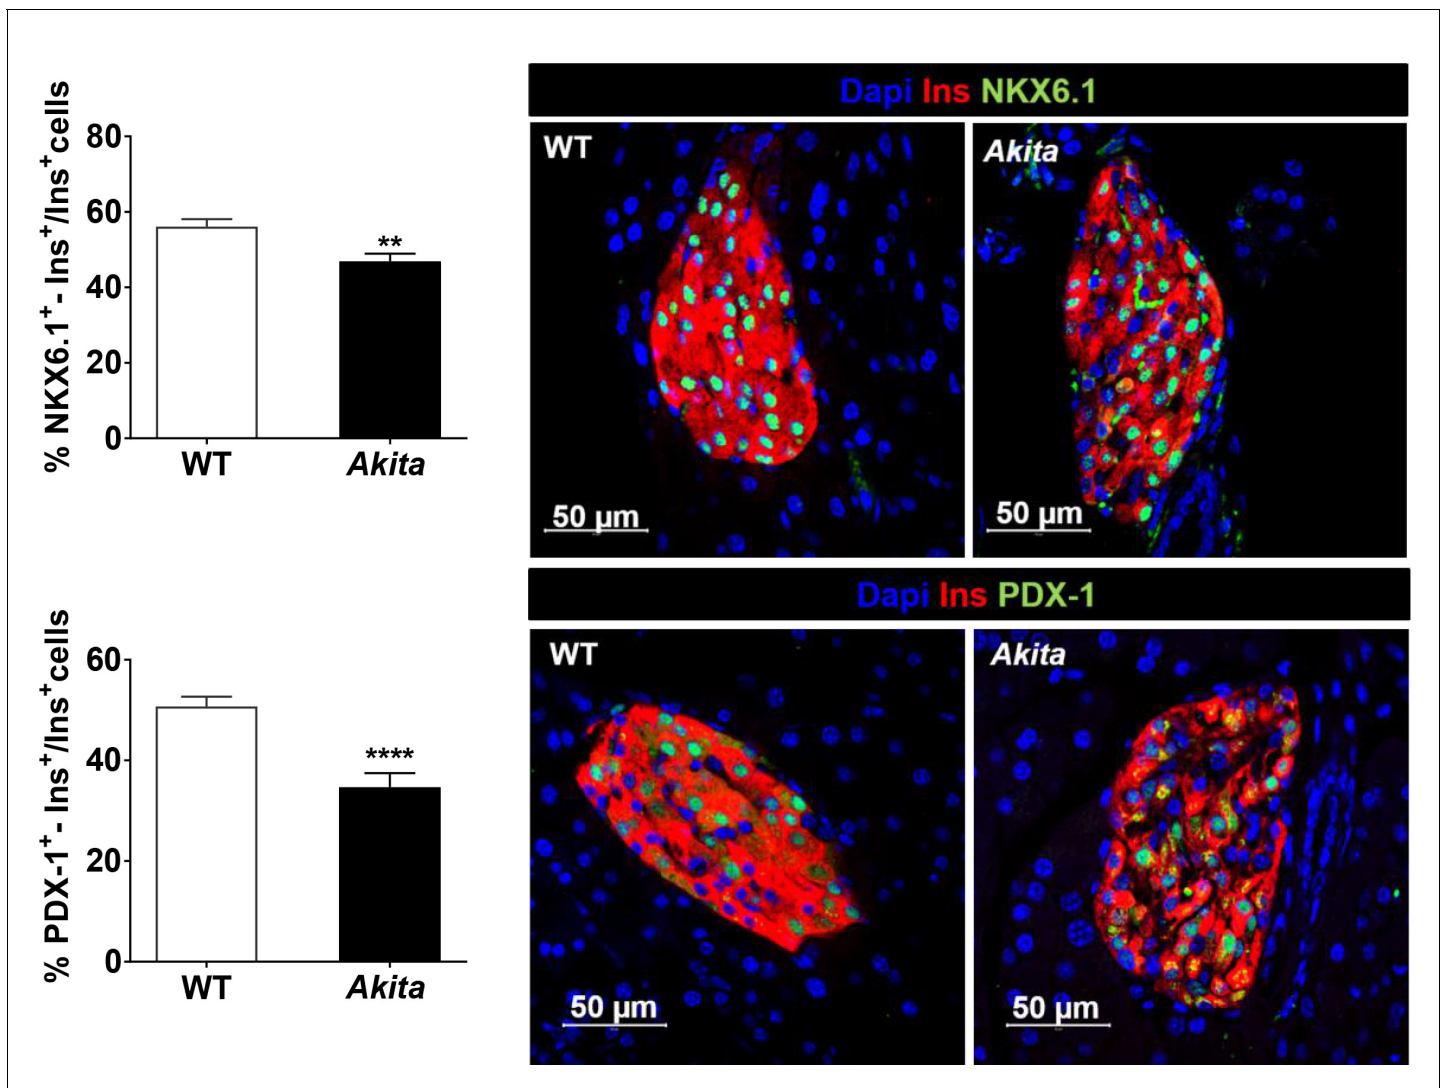

**Figure 1—figure supplement 2.** NKX6.1 and PDX-1 expression in adult *Akita*β-cells. Pancreatic sections of 2- to 3-month-old *Akita* and control mice were stained for NKX6.1 (n = 5 mice in each group; 3348 WT and 2370 *Akita* β-cells) or PDX-1 and insulin (n = 5–7 mice in each group; 4580 WT and 2320 *Akita* β-cells). Values are mean ± SE. \*\*p<0.01, \*\*\*\*p<0.0001.

DOI: <https://doi.org/10.7554/eLife.38472.005>



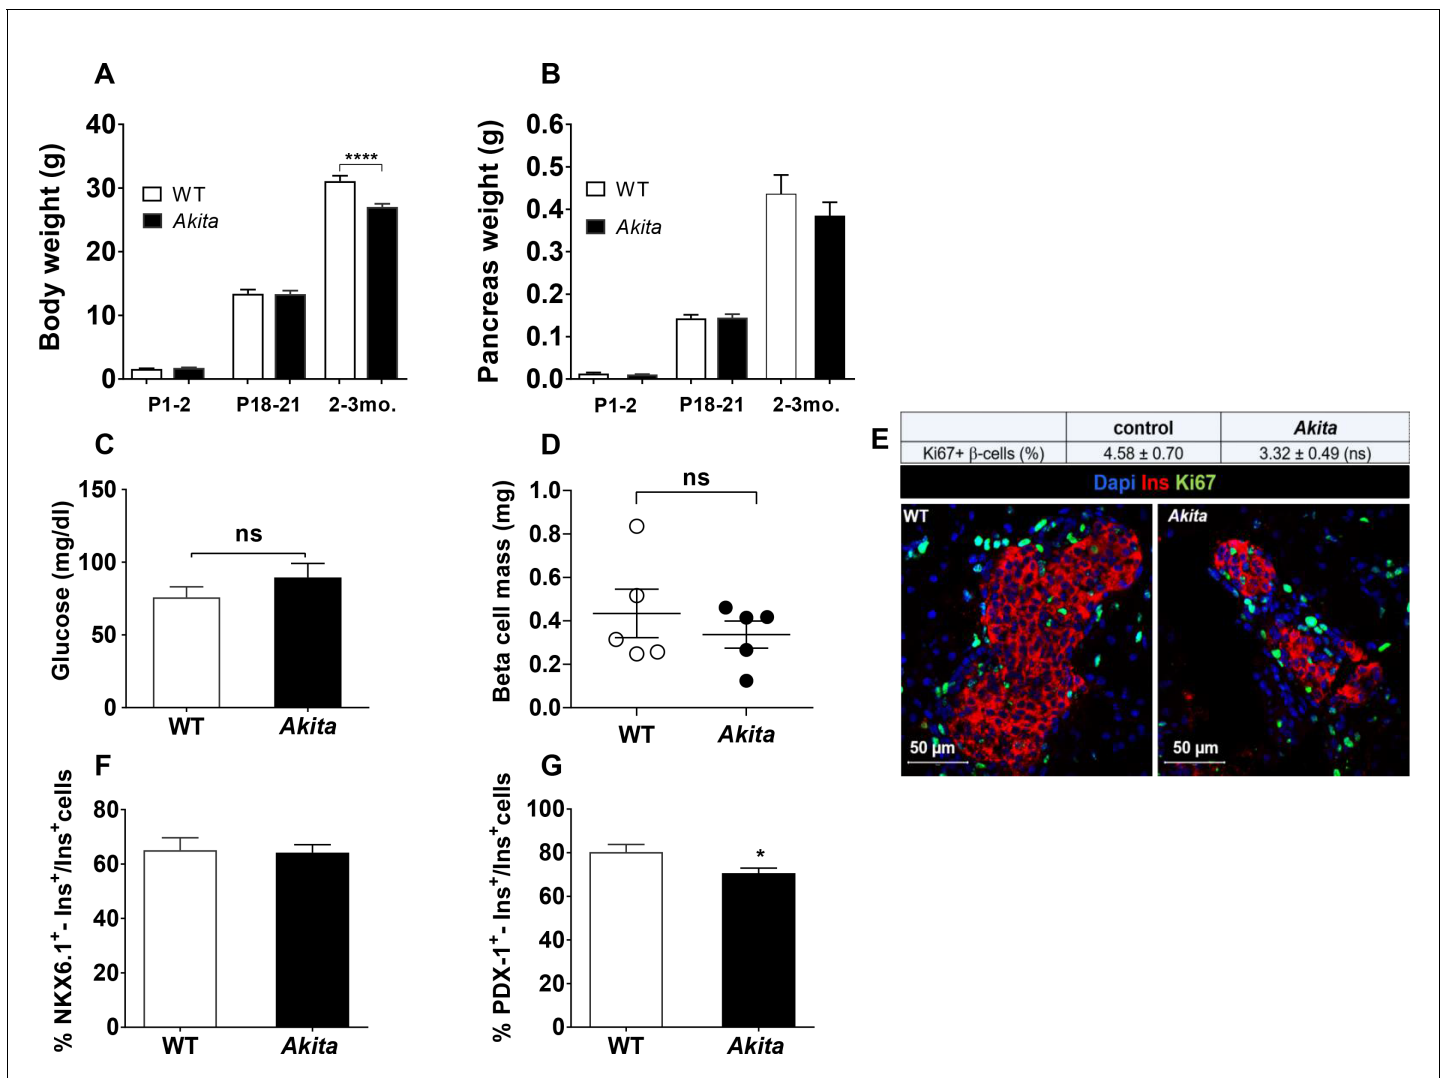

**Figure 2.** Dynamic changes of body and pancreas growth and glycemia,  $\beta$ -cell mass, proliferation and differentiation in Akita and control mice at P1-2. (a) body weight, (b) pancreas weight of wild-type and Akita mice at P1-2, P19-21 and at the age of 2–3 months. (a) P1-2: WT ( $n = 8$ ); Akita mice ( $n = 4$ ), P19-21: WT ( $n = 21$ ); Akita mice ( $n = 23$ ), 2–3 months: WT ( $n = 33$ ); Akita mice ( $n = 39$ ); (b) P1-2: WT ( $n = 8$ ); Akita mice ( $n = 4$ ), P19-21:  $n = 14$  in each group, 2–3 months:  $n = 17$  mice in each group). (c) fed blood glucose ( $n = 7$ –8 mice in each group); (d)  $\beta$ -cell mass ( $n = 5$  mice in each group); (e)  $\beta$ -cell proliferation assessed by immunostaining for insulin and Ki67 ( $n = 4$  mice in each group; 1886 WT and 1483 Akita  $\beta$ -cells). The percentage of Ki67<sup>+</sup>  $\beta$ -cells is shown in the table above; (f–g) quantification of  $\beta$ -cells (insulin<sup>+</sup>) expressing NKX6.1 ( $n = 3$ –4 mice in each group; 1148 WT and 1808 Akita  $\beta$ -cells) and PDX-1 ( $n = 3$ –5 mice in each group; 1364 WT and 1507 Akita  $\beta$ -cells). \* $p < 0.05$ , \*\*\*\* $p < 0.0001$ .

DOI: <https://doi.org/10.7554/eLife.38472.006>

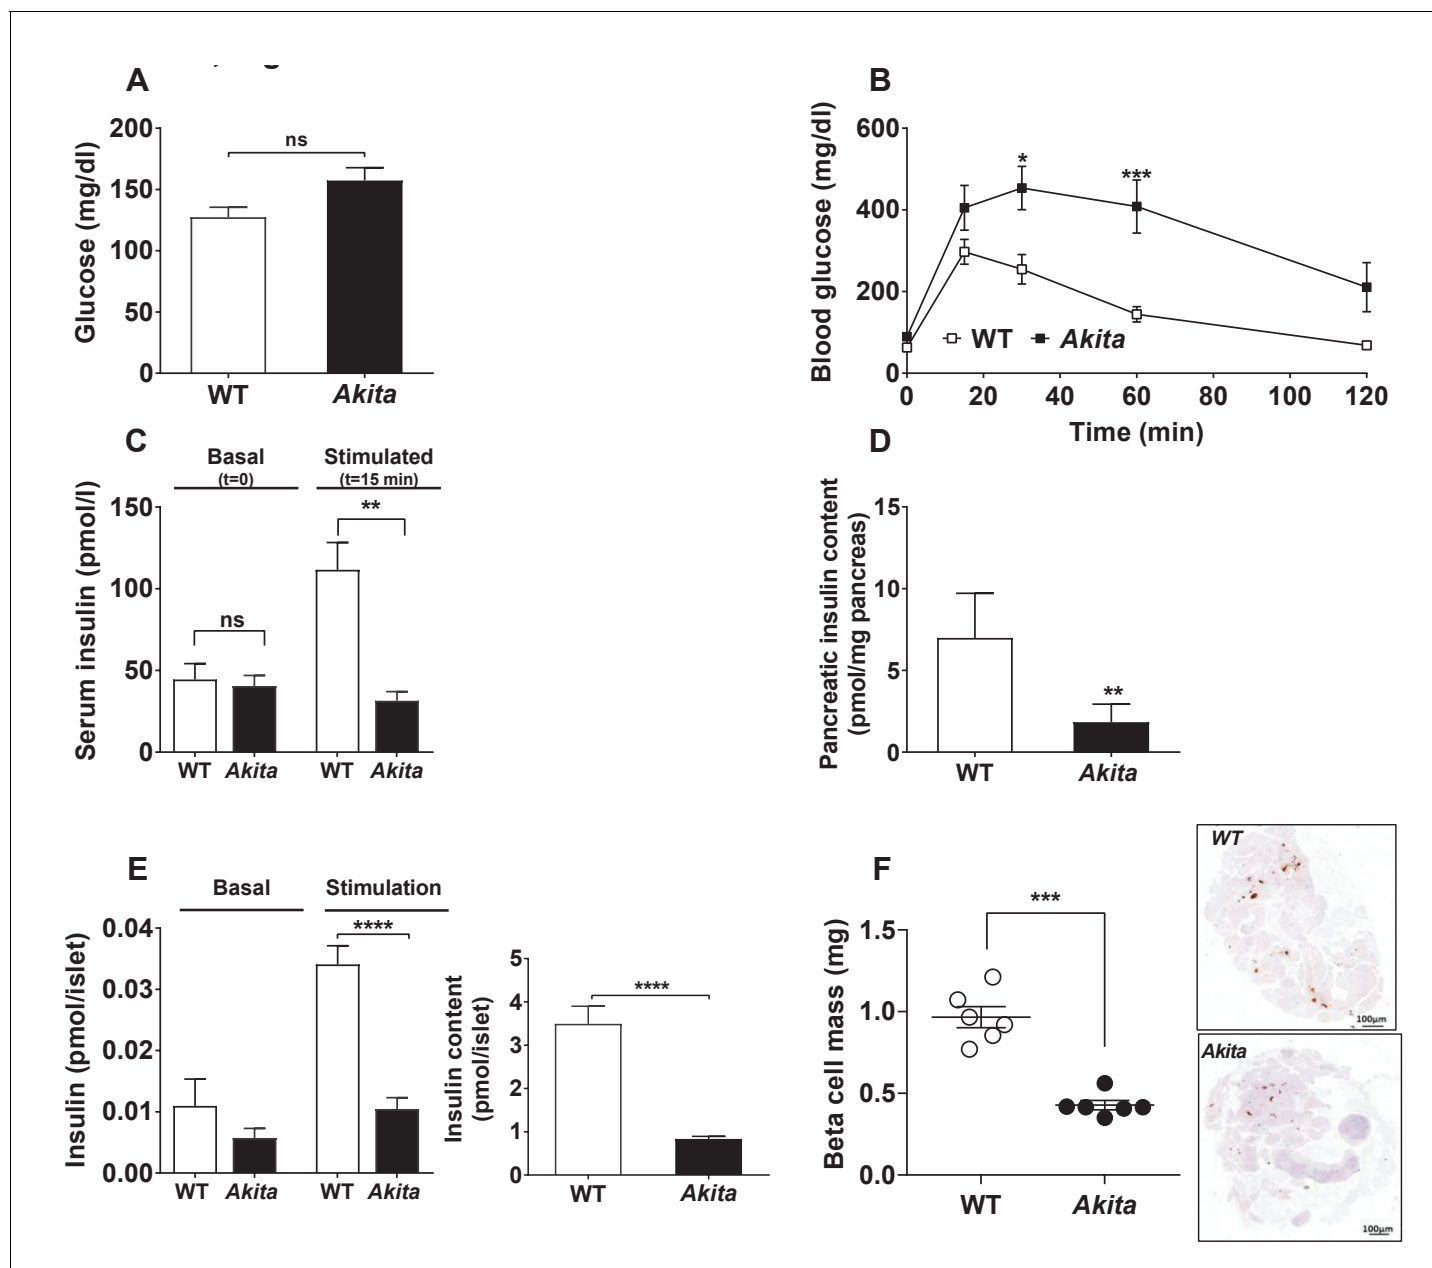

**Figure 3.** Metabolic state,  $\beta$ -cell function and mass in pre-weaning (P19-21) *Akita* mice and age-matched controls. (a) fed blood glucose ( $n = 7$  in each group); (b) IPGTT- glucose (1.5 g/kg) was injected intraperitoneally after an overnight fast ( $n = 5$  in each group); (c) glucose-stimulated insulin secretion in vivo. Insulin was measured before and 15 min following IP glucose injection (1.5 g/kg); (d) pancreatic insulin content ( $n = 4-5$  in each group); (e) basal (3.3 mmol/l glucose) and stimulated (16.7 mmol/l glucose) insulin secretion and insulin content of *Akita* and control islets analyzed by static incubations. Islets were divided into 4 batches of 25 islets per group ( $n = 3$ ); (f)  $\beta$ -cell mass ( $n = 6$  mice in each group). \* $p < 0.05$ , \*\* $p < 0.01$ , \*\*\* $p < 0.001$ , \*\*\*\* $p < 0.0001$ . DOI: <https://doi.org/10.7554/eLife.38472.007>

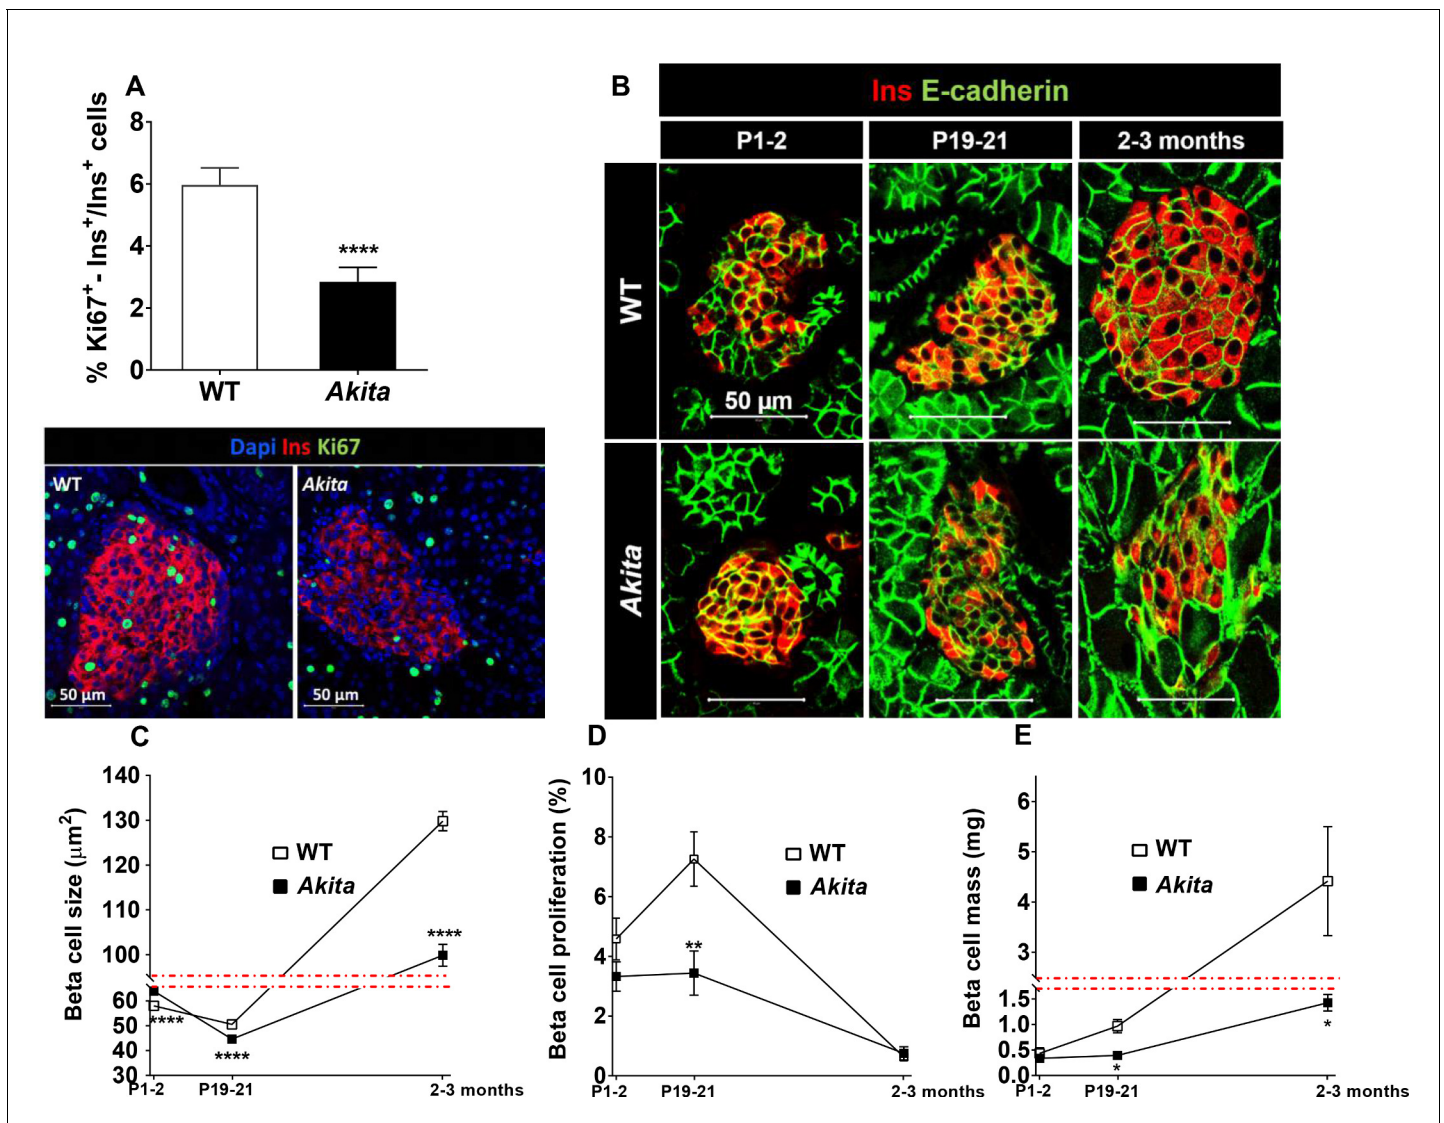

**Figure 4.** Dynamic changes in  $\beta$ -cell expansion in Akita and control mice. (a)  $\beta$ -cell proliferation assessed by immunostaining for insulin and Ki67 ( $n = 6$  mice in each group; 2541 WT and 3391 Akita  $\beta$ -cells); (b)  $\beta$ -cell size at P1-2 (newborn,  $n = 4$ –5 mice in each group; 334 WT and 435 Akita  $\beta$ -cells), P19-21 (pre-weaning,  $n = 3$  mice in each group; 330 WT and 364 Akita  $\beta$ -cells) and in adult mice (2–3 month-old,  $n = 3$  mice in each group; 266 WT and 417 Akita  $\beta$ -cells) assessed by immunostaining for E-cadherin and insulin. Quantifications of  $\beta$ -cell size (c), proliferation (d), and mass (e) are shown.

\* $p < 0.05$ , \*\* $p < 0.01$ , \*\*\*\* $p < 0.0001$ .

DOI: <https://doi.org/10.7554/eLife.38472.008>

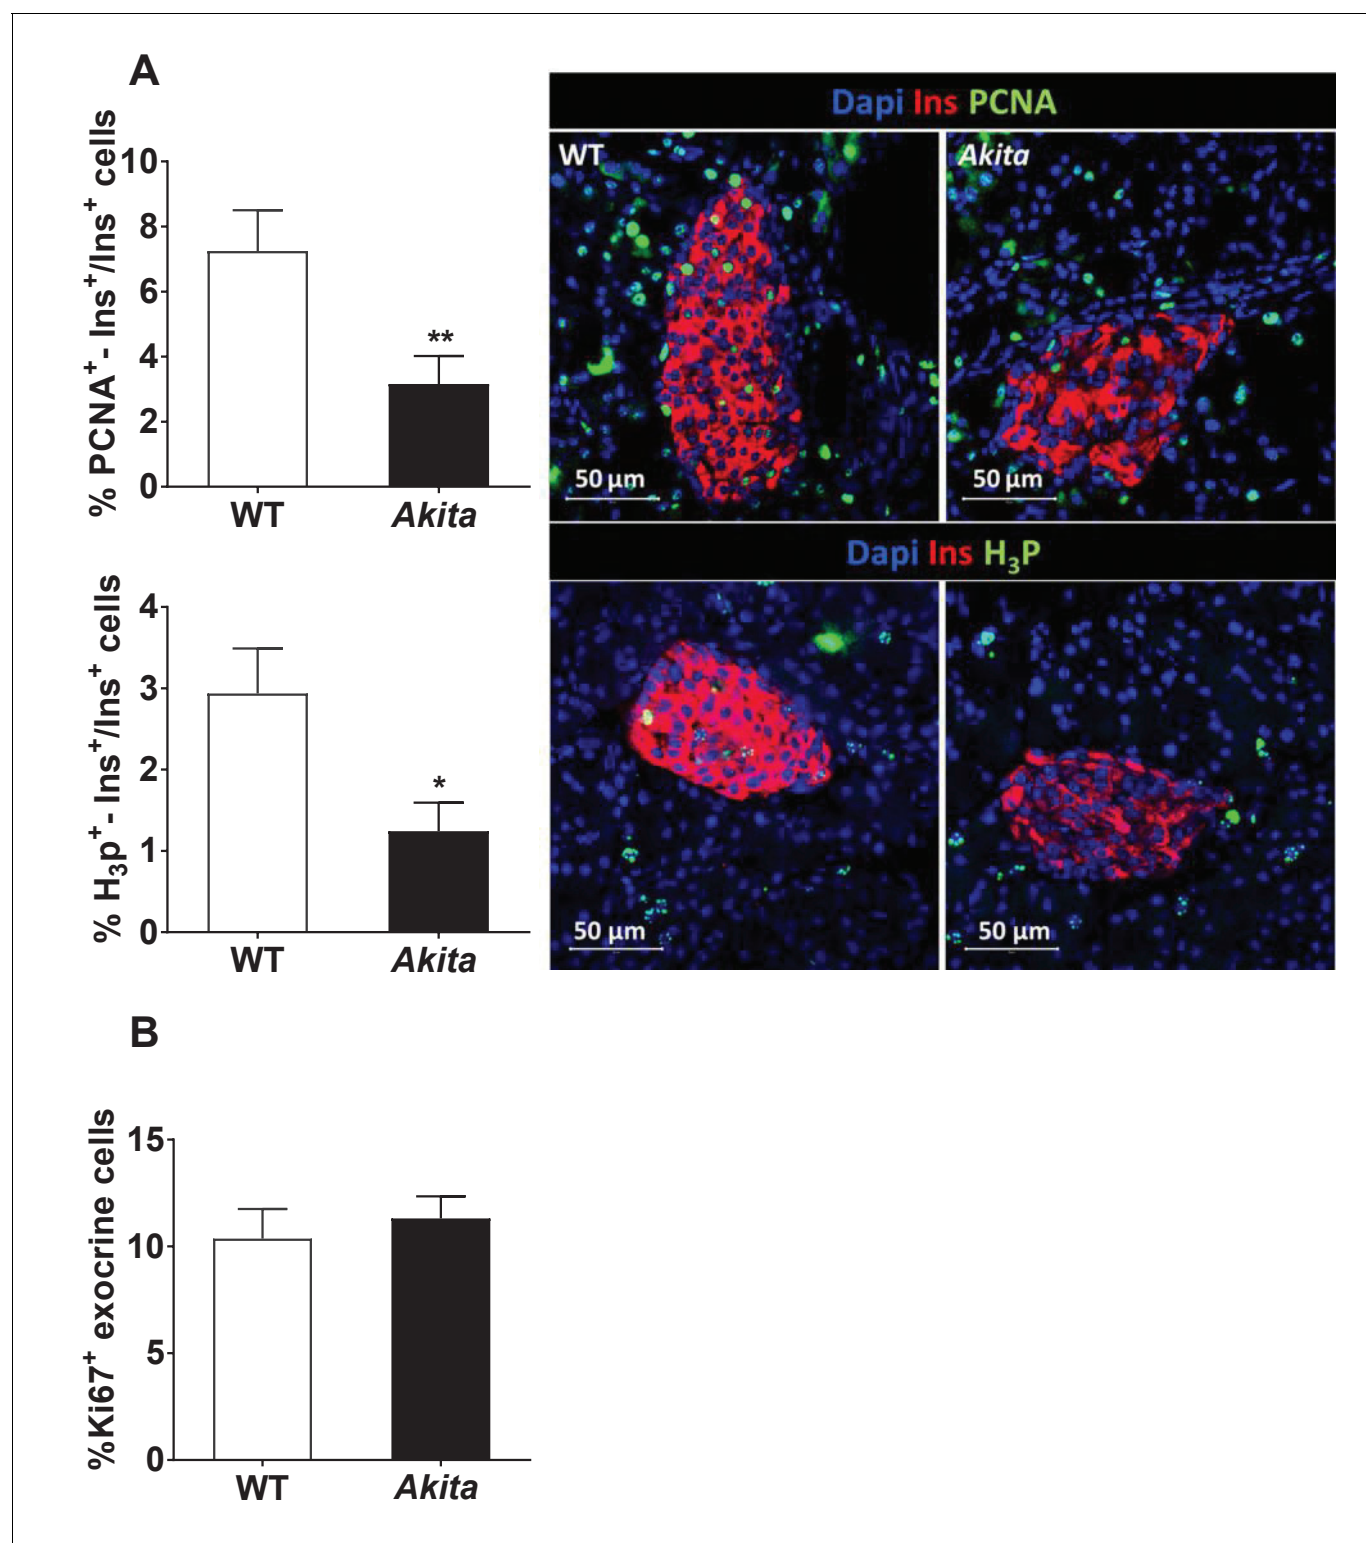

**Figure 4—figure supplement 1.** Proliferation of  $\beta$ -cells and exocrine cells in pre-weaning Akita and control mice. Analyses were performed on pancreatic sections of Akita mice and age-matched controls at 19–21 days stained for proliferation markers. (a)  $\beta$ -Cell proliferation was assessed by staining for insulin and PCNA ( $n = 3$  mice in each group; 1241 WT and 1944 Akita  $\beta$  cells), or phospho-Histone H<sub>3</sub> (H<sub>3</sub>P  $n = 3$  mice in each group; 1176 WT and 1982 Akita  $\beta$ -cells). (b) Proliferation of pancreatic exocrine cells in pre-weaning Akita and control mice. Pancreatic sections of pre-weaning Akita and control mice were stained for insulin and Ki67 and exocrine cells surrounding the islets were used for quantification. The percentage of proliferating exocrine cells (Ki67<sup>+</sup>/INS<sup>+</sup>) is shown ( $n = 6$  mice in each group; 2486 WT and 2670 Akita cells). \* $p < 0.05$ , \*\* $p < 0.01$ .

DOI: <https://doi.org/10.7554/eLife.38472.009>

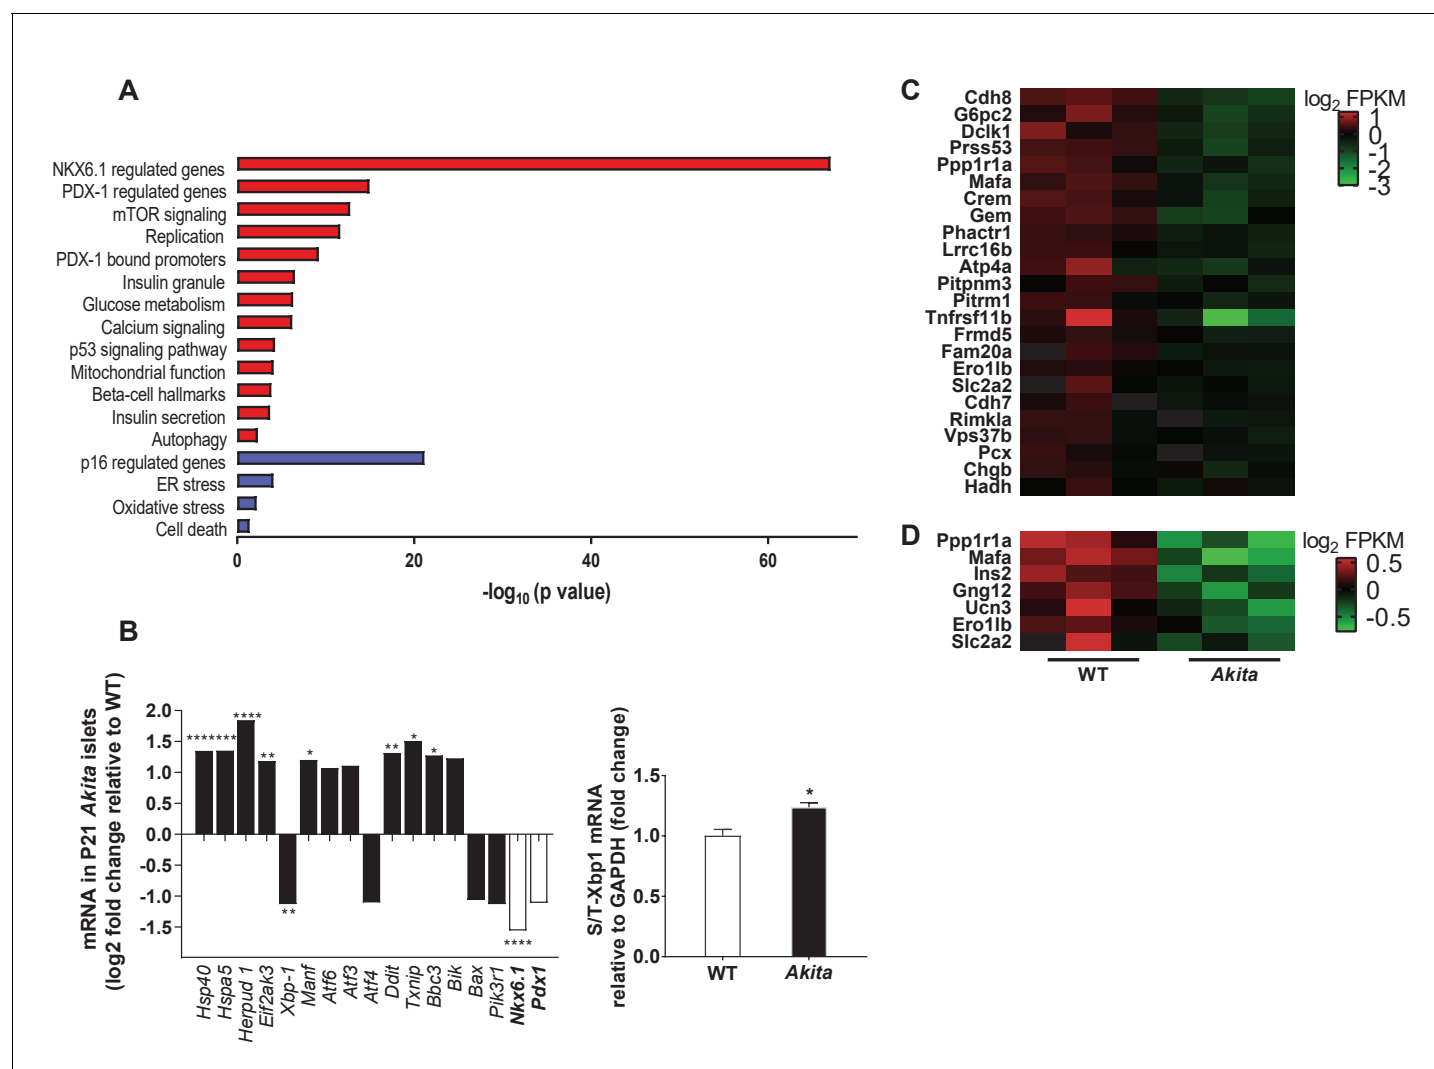

**Figure 5.** Transcriptomic analysis of ER stress markers and  $\beta$ -cell gene signature in neonate Akita islets. (a) RNA-seq comparing the transcriptome of islets from P19-21 Akita and age-matched control mice ( $n = 3$  samples in each group, each sample is a pool of islets from three mice). Columns represent pathways that are differentially regulated in Akita mice; (b) expression of UPR and apoptosis genes and of *Nkx6.1* and *Pdx1* in islets of Akita compared to control mice at P19-21. Spliced and total *Xbp1* were also quantified by qPCR. The spliced/total *Xbp1* ratio is shown beside ( $n = 3$ ); (c–d) heat map of genes regulated by NKX6.1 (c) and PDX-1 (d) in Akita islets and controls. \* $p < 0.05$ , \*\* $p < 0.01$ , \*\*\* $p < 0.001$ , \*\*\*\* $p < 0.0001$ .

DOI: <https://doi.org/10.7554/eLife.38472.010>

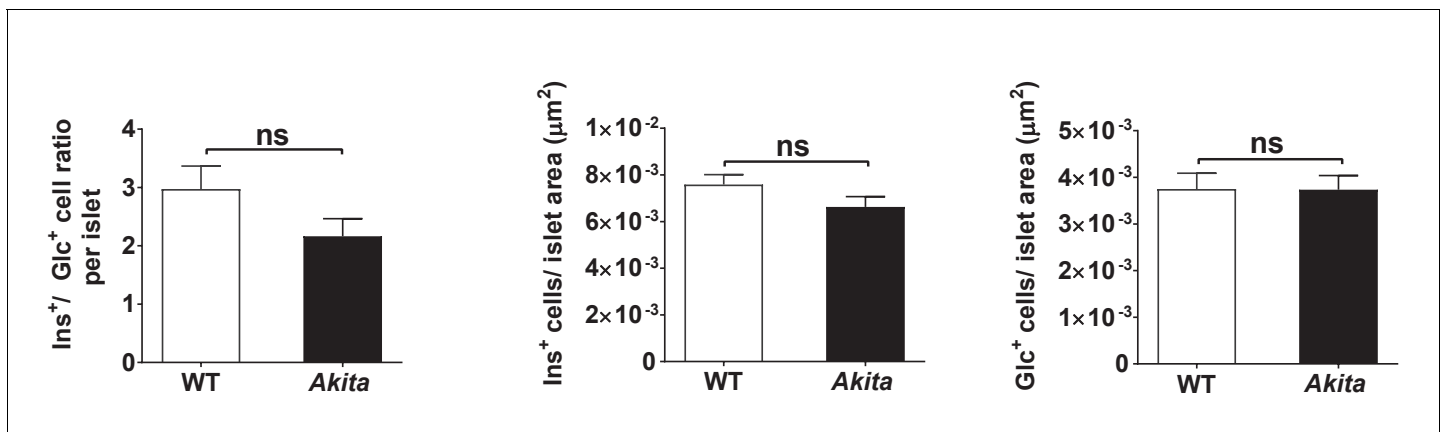

**Figure 5—figure supplement 1.** Islet composition of wild-type and *Akita* mice.  $\beta/\alpha$  cell ratio and number of  $\beta$  and  $\alpha$  cells per islet area in P19-21 wild-type and *Akita* mice ( $n = 44$  and  $35$  islets isolated from three to four mice in each group).

DOI: <https://doi.org/10.7554/eLife.38472.011>



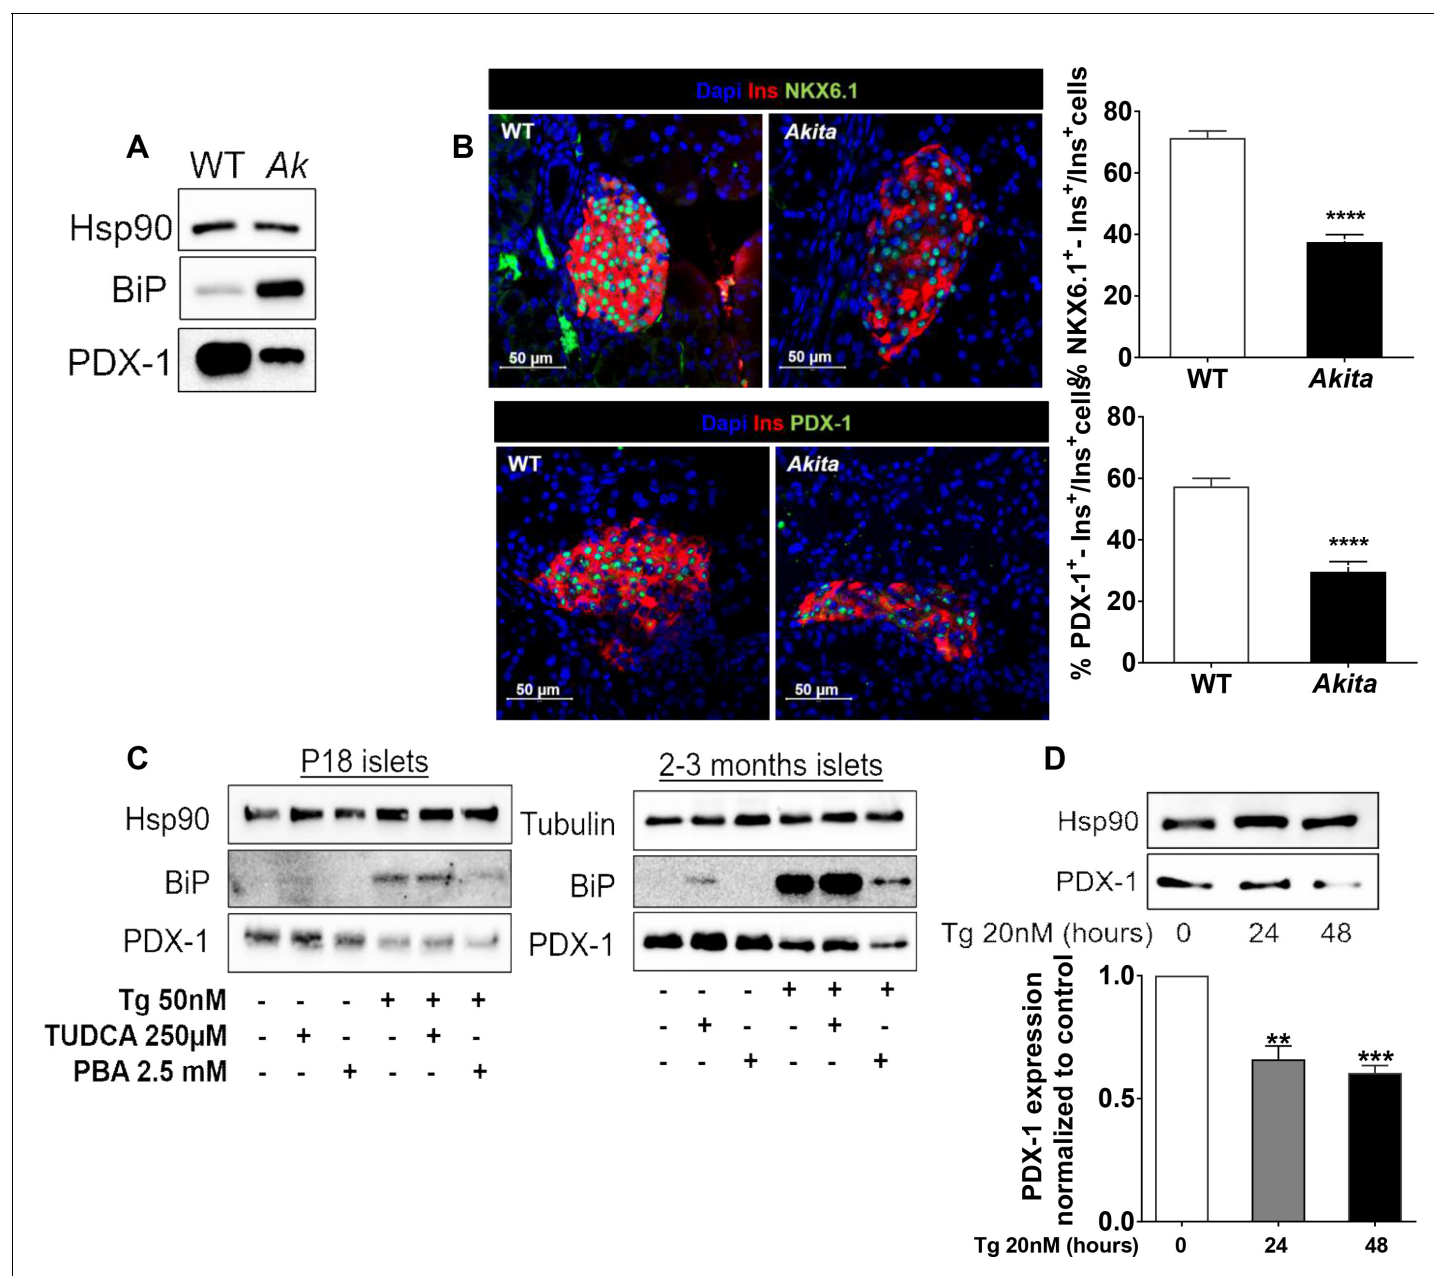

**Figure 6.** Effects of ER stress on the expression of  $\beta$ -cell transcription factors in neonate *Akita* islets (P19-21) and islets treated with thapsigargin. (a) PDX-1 and BiP protein level analyzed by Western blotting ( $n = 3$ , each sample is a pool of islets from four to six mice); (b) quantification of NKX6.1 ( $n = 3$  mice in each group; 1646 WT and 728 *Akita*  $\beta$ -cells), and PDX-1 ( $n = 3$  mice in each group; 1534 WT and 844 *Akita*  $\beta$ -cells) expressing  $\beta$ -cells. Pancreatic sections were immunostained for NKX6.1 or PDX-1 and insulin. The percentage of NKX6.1- and PDX-1-positive  $\beta$ -cells is shown. (c) Islets from young (P19-21) and adult wild-type mice were treated with low-dose thapsigargin (50 nmol/l) and TUDCA (250  $\mu$ mol/l) or PBA (2.5 mmol/l) for 48 hr with daily media changes and further analyzed by western blotting for PDX-1 and BiP ( $n = 3$ , each sample is a pool of islets from six to nine mice); (d) INS-1E cells were treated with 20 nmol/l thapsigargin for 24 and 48 hr followed by western blotting for PDX-1. \*\* $p < 0.01$ , \*\*\* $p < 0.001$ , \*\*\*\* $p < 0.0001$ .

DOI: <https://doi.org/10.7554/eLife.38472.012>

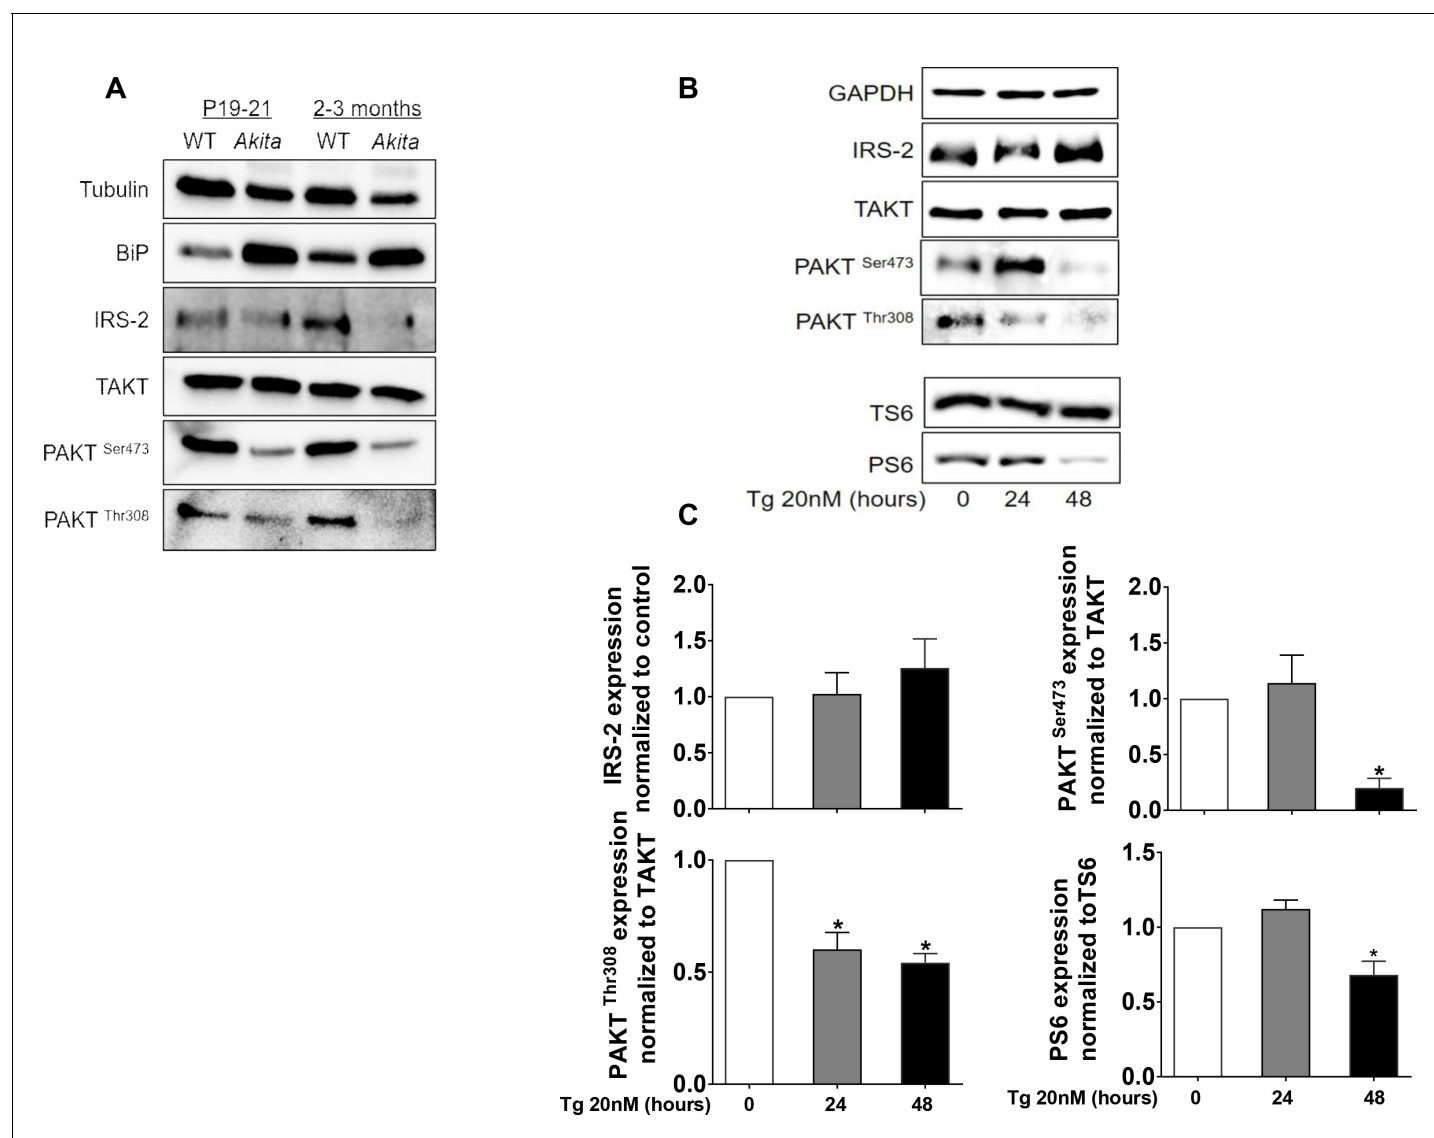

**Figure 7.** Effects of ER stress on IRS2/Akt signaling in *Akita* islets and in INS-1E treated with low-dose thapsigargin. (a) IRS2/Akt signaling in islets from neonate (P19-21) and adult wild-type and *Akita* mice. Each sample is a pool of islets from 4 to 15 mice ( $n = 4$  for neonate islets and  $n = 2$  for adult islets). (b–c) INS-1E cells were treated with 20 nmol/l thapsigargin for 24 and 48 hr followed by western blotting for IRS2, total and phosphorylated Akt (Ser473 and Thr308) and S6 (Ser240/244). A representative experiment (b) and quantification (c) are shown ( $n = 4–6$ ). \* $p < 0.05$ .

DOI: <https://doi.org/10.7554/eLife.38472.014>

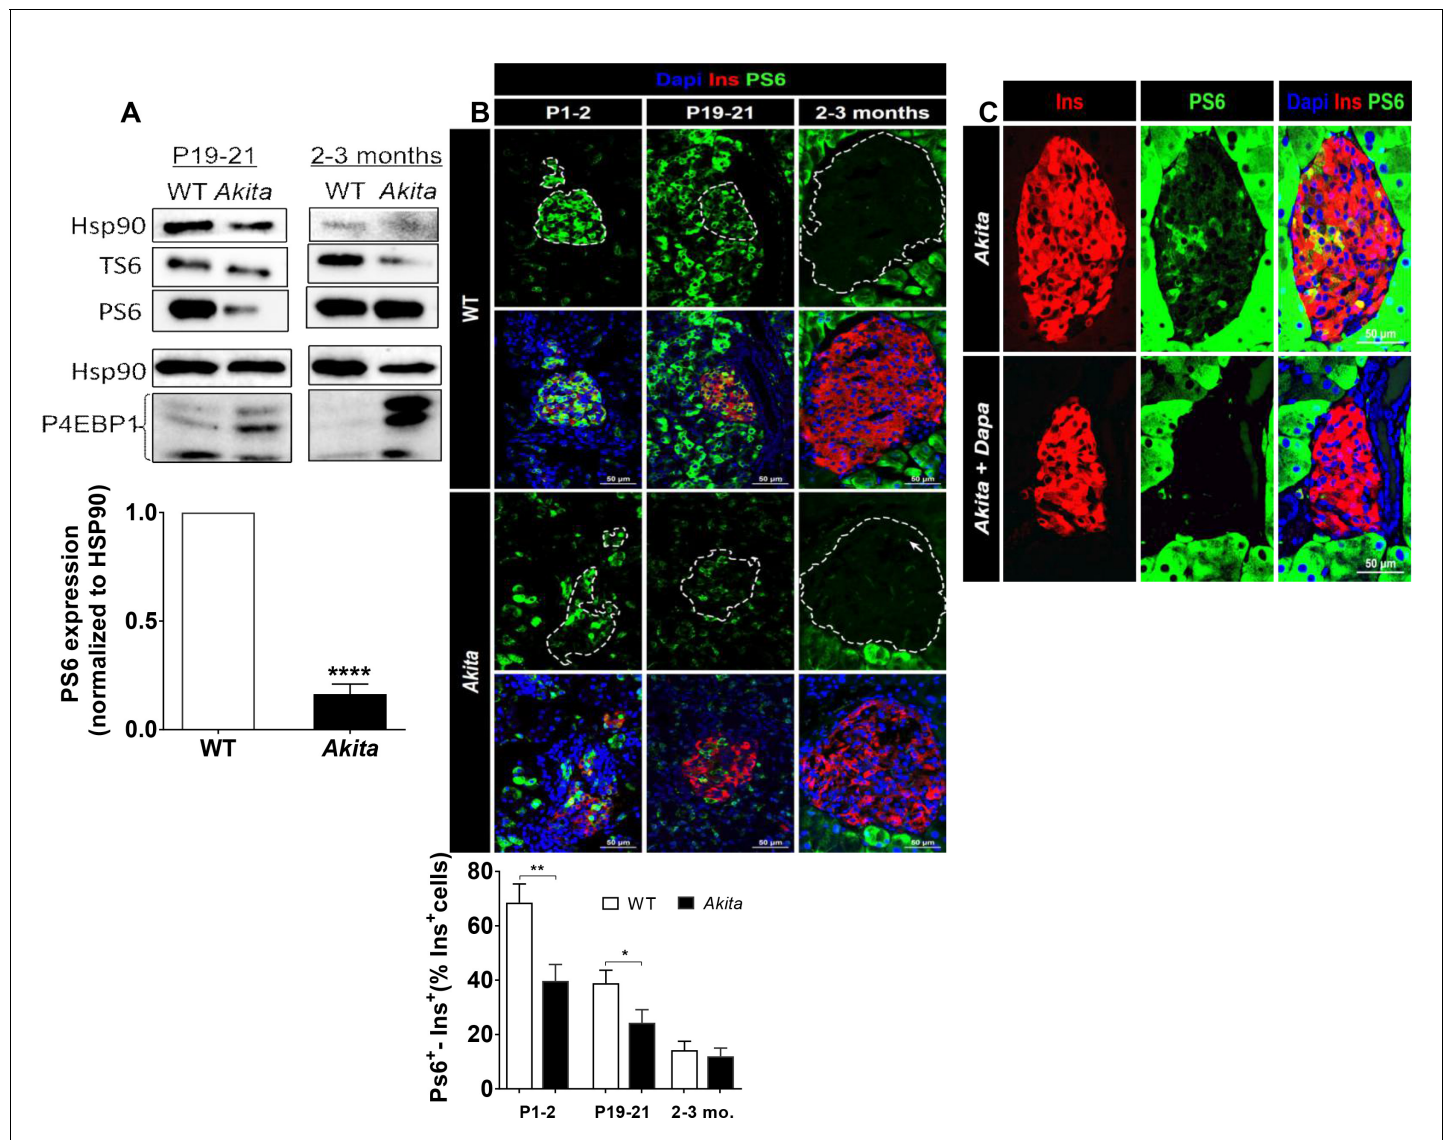

**Figure 8.** mTORC1 signaling in neonate and adult *Akita* islets. (a) Western blot analysis of S6 and 4EBP1 phosphorylation in islets of neonate (P19-21) and adult wild-type and *Akita* mice. Quantification of phosphorylated S6 in neonate *Akita* compared to control islets is shown (n = 3, each sample is a pool of islets from 4 to 7 mice); (b) immunostaining for phospho-S6 on pancreatic sections of P1-2, P19-21 and adult *Akita* mice and age-matched controls and quantifications of the percentage of S6<sup>+</sup> β-cells (P1-2: n = 4 mice in each group; 1159 WT and 1655 *Akita* β-cells; P19-21: n = 6 mice in each group; 2259 WT and 1567 *Akita* β-cells; adult: n = 4–5 mice in each group; 2391 WT and 1383 *Akita* β-cells). Islet boundaries are marked by dotted line; (c) adult *Akita* mice were treated with 25 mg/kg dapagliflozin in drinking water for 72 hr. Blood glucose in dapagliflozin-treated *Akita* mice was ~200 mg/dl compared to ~500 mg/dl in control *Akita* mice. Pancreatic sections were immunostained for insulin and phospho-S6 (n = 3 mice in each group). \*p<0.05, \*\*p<0.01, \*\*\*\*p<0.0001.

DOI: <https://doi.org/10.7554/eLife.38472.015>

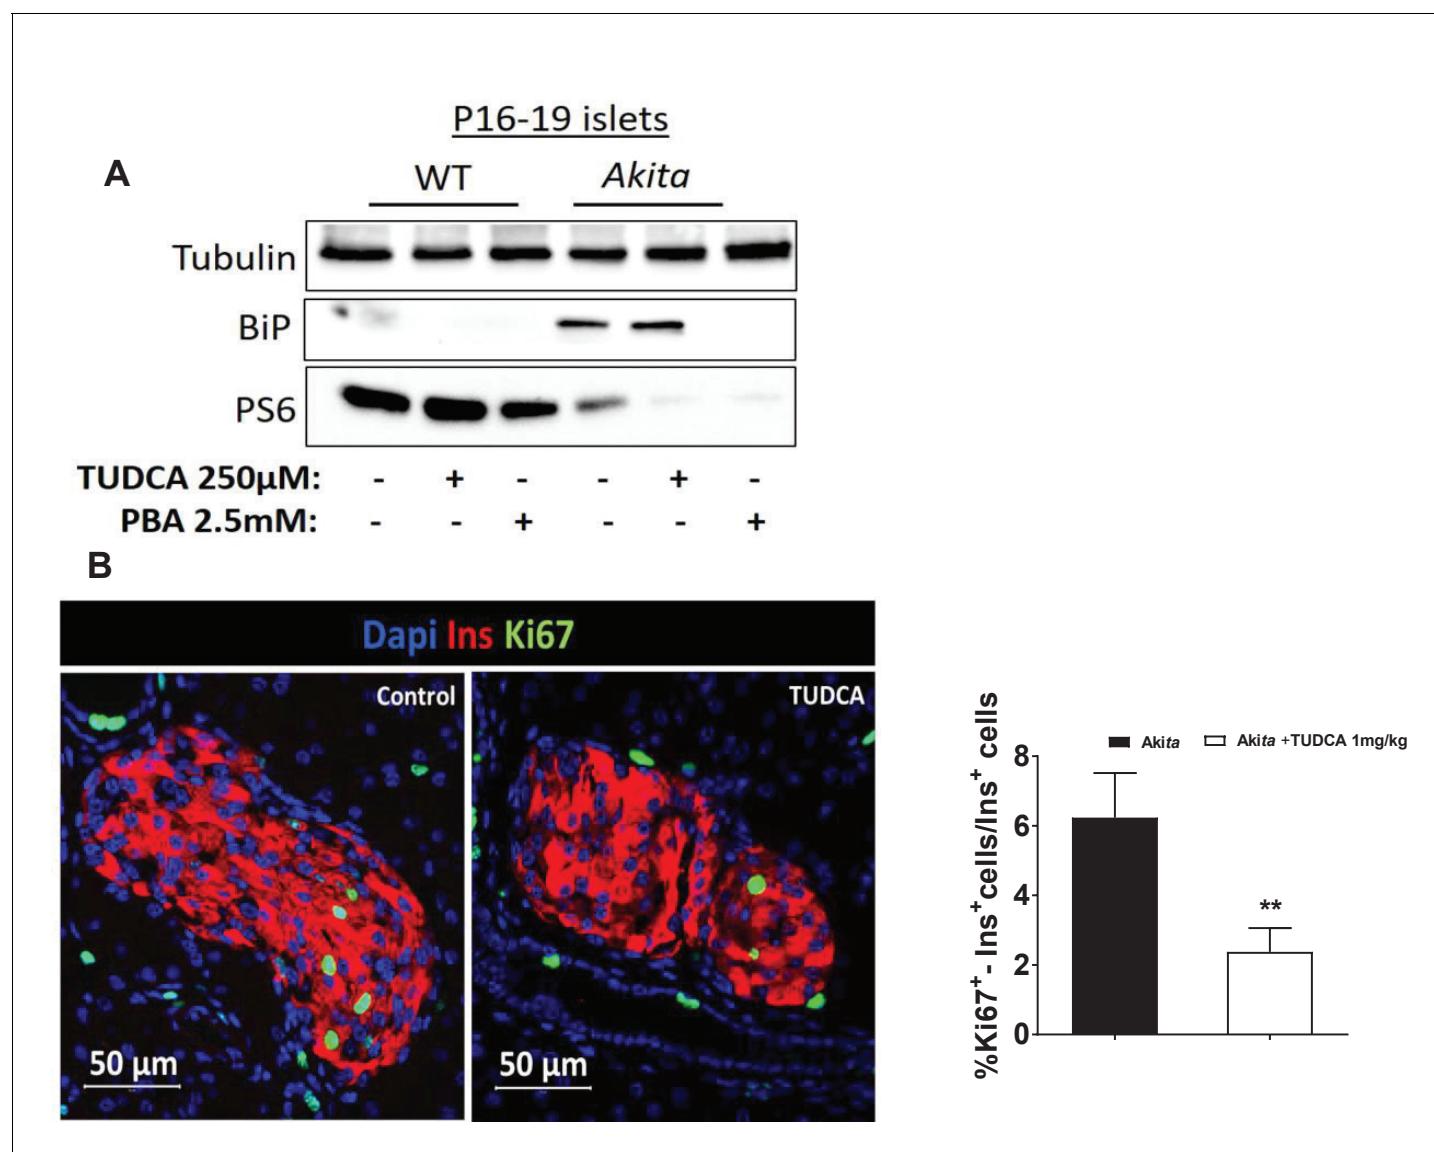

**Figure 8—figure supplement 1.** Effects of chemical chaperones on mTORC1 activity in neonate *Akita* islets and controls. (a) islets of P16-19 *Akita* and wild-type (WT) mice were treated with 250 μmol/l TUDCA or 2.5 mmol/l PBA for 48 hr followed by western blotting for BiP and phosphorylated S6 ( $n = 3$ , each sample is a pool of islets from 4 to 9 mice); (b) effects of TUDCA on  $\beta$ -cell proliferation in neonate *Akita* mice (P18-20). TUDCA (1 mg/kg) was injected IP twice daily for 48 hr followed by immunostaining of pancreatic sections for Ki67 and insulin ( $n = 4-6$  mice in each group; 1403 control *Akita* and 2183 TUDCA-treated *Akita* $\beta$ -cells). \*\* $p < 0.01$ .

DOI: <https://doi.org/10.7554/eLife.38472.016>



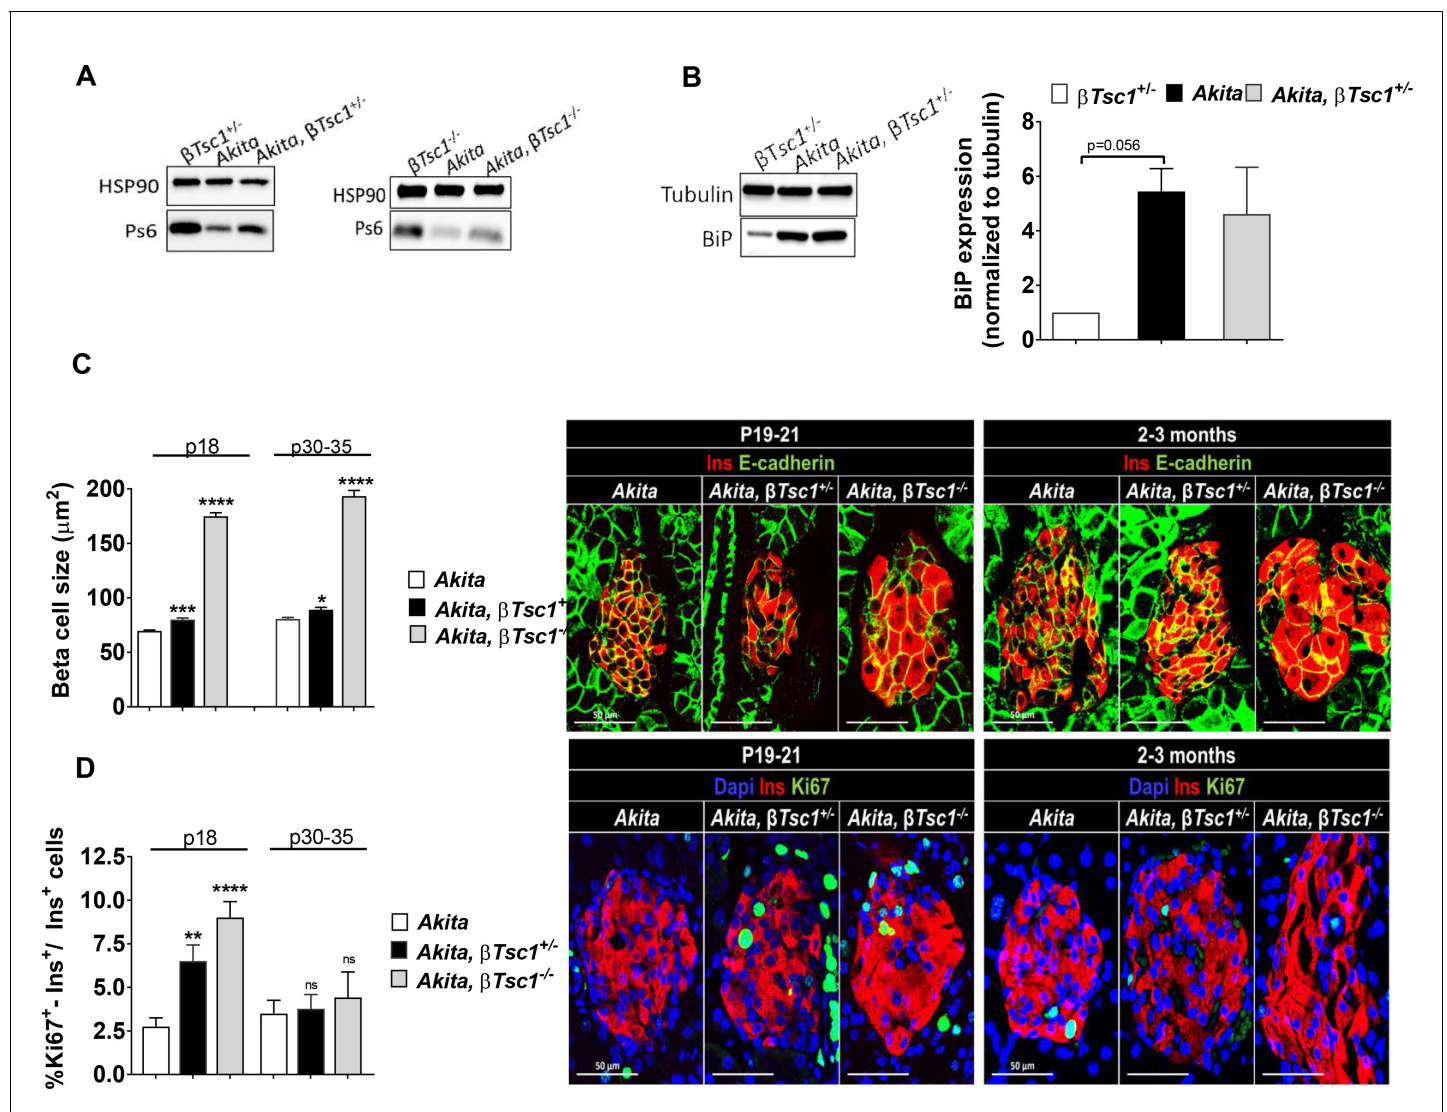

**Figure 9.** Effects of mTORC1 activation in neonate Akita  $\beta$ -cells on  $\beta$ -cell size and proliferation. Studies were performed on heterozygous and homozygous  $\beta Tsc1$  knockout Akita mice ( $RIP-Cre:Tsc1^{flox/+}$ :Akita (Akita,  $\beta Tsc1^{+/-}$ ) and  $RIP-Cre:Tsc1^{flox/flox}$ :Akita (Akita,  $\beta Tsc1^{-/-}$ ).  $Tsc1^{flox/+}$ :Akita and  $Tsc1^{flox/flox}$ :Akita were used as Akita controls.  $RIP-Cre:Tsc1^{flox/+}$  mice ( $\beta Tsc1^{+/-}$ ) and  $RIP-Cre:Tsc1^{flox/flox}$  mice ( $\beta Tsc1^{-/-}$ ) were used as WT controls (a, b). (a) Western blotting for phospho-S6 on islets from homozygous and heterozygous knockout mice and matched controls ( $n = 4$ , each sample is a pool of islets from two to four mice); (b) Western blotting and quantification of BiP expression in wild-type, Akita and Akita,  $\beta Tsc1^{+/-}$  mice ( $n = 4$ , each sample is a pool of islets from two to four mice); (c)  $\beta$ -cell size was assessed by immunostaining for insulin and E-cadherin ( $n = 400$ –500  $\beta$ -cells per group), (d)  $\beta$ -cell proliferation was assessed by immunostaining for insulin and Ki67 ( $n = 1200$ –1400  $\beta$ -cells per group). Quantifications and representative images are shown. \* $p < 0.05$ , \*\* $p < 0.01$ , \*\*\* $p < 0.001$ , \*\*\*\* $p < 0.0001$ .

DOI: <https://doi.org/10.7554/eLife.38472.017>

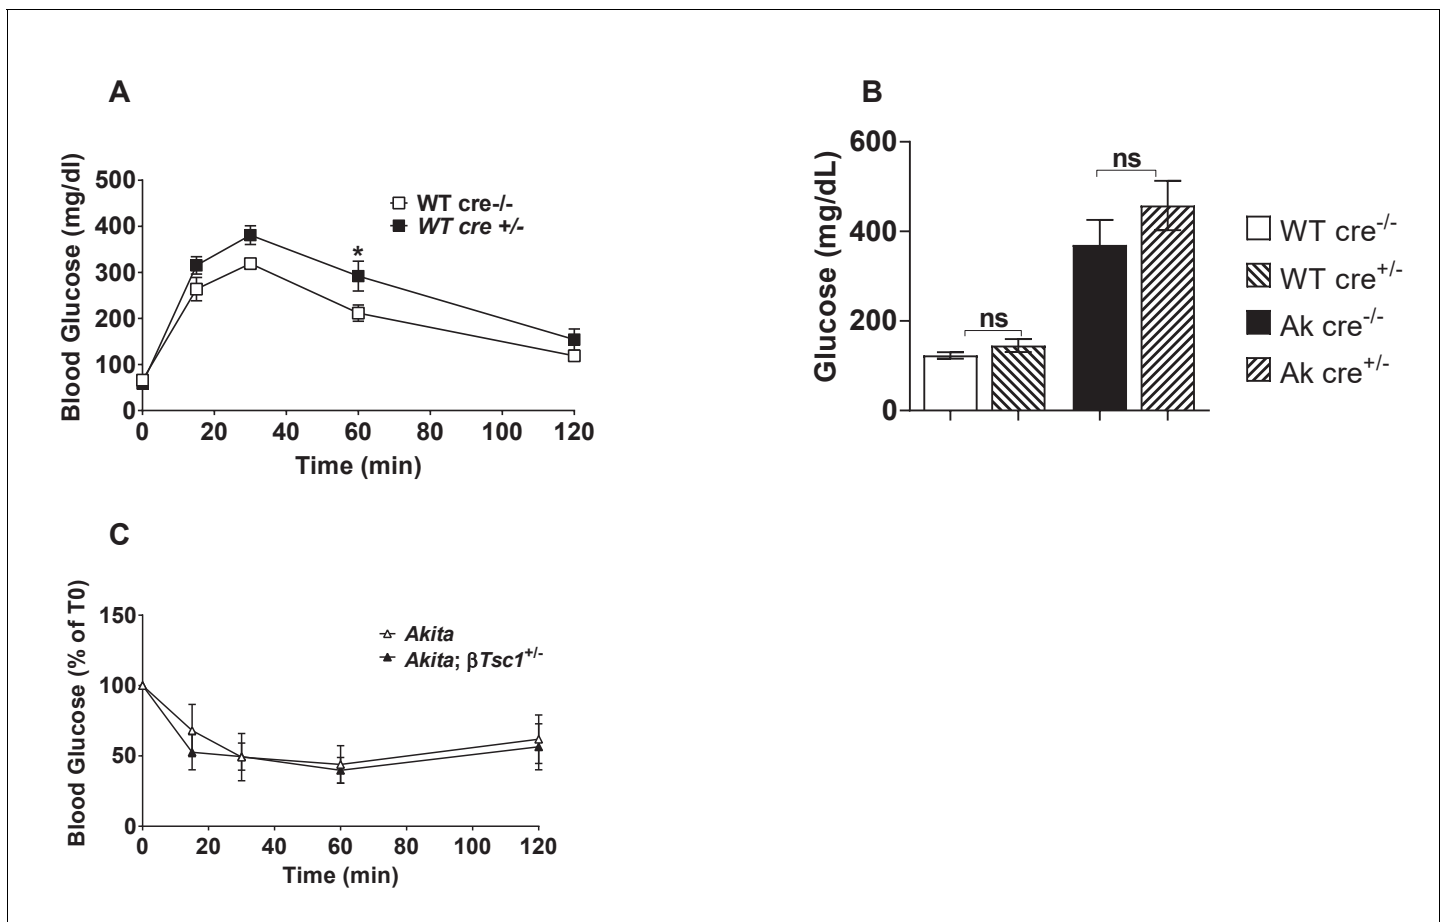

**Figure 9—figure supplement 1.** Metabolic characterization of *RIP-Cre* mouse. (a) IPGTT- glucose (1.5 gr/kg) was injected after an overnight fast to adult *RIP-Cre* and non-transgenic control mice ( $n = 3$ ); (b) fed blood glucose of adult *RIP-Cre* mice and *RIP-Cre:Akita* mice compared to non-transgenic controls ( $n = 6-8$ ); (c) insulin tolerance test on *Akita* and *RIP-Cre:Akita* mice ( $n = 3$ ). \* $p < 0.05$ .

DOI: <https://doi.org/10.7554/eLife.38472.018>



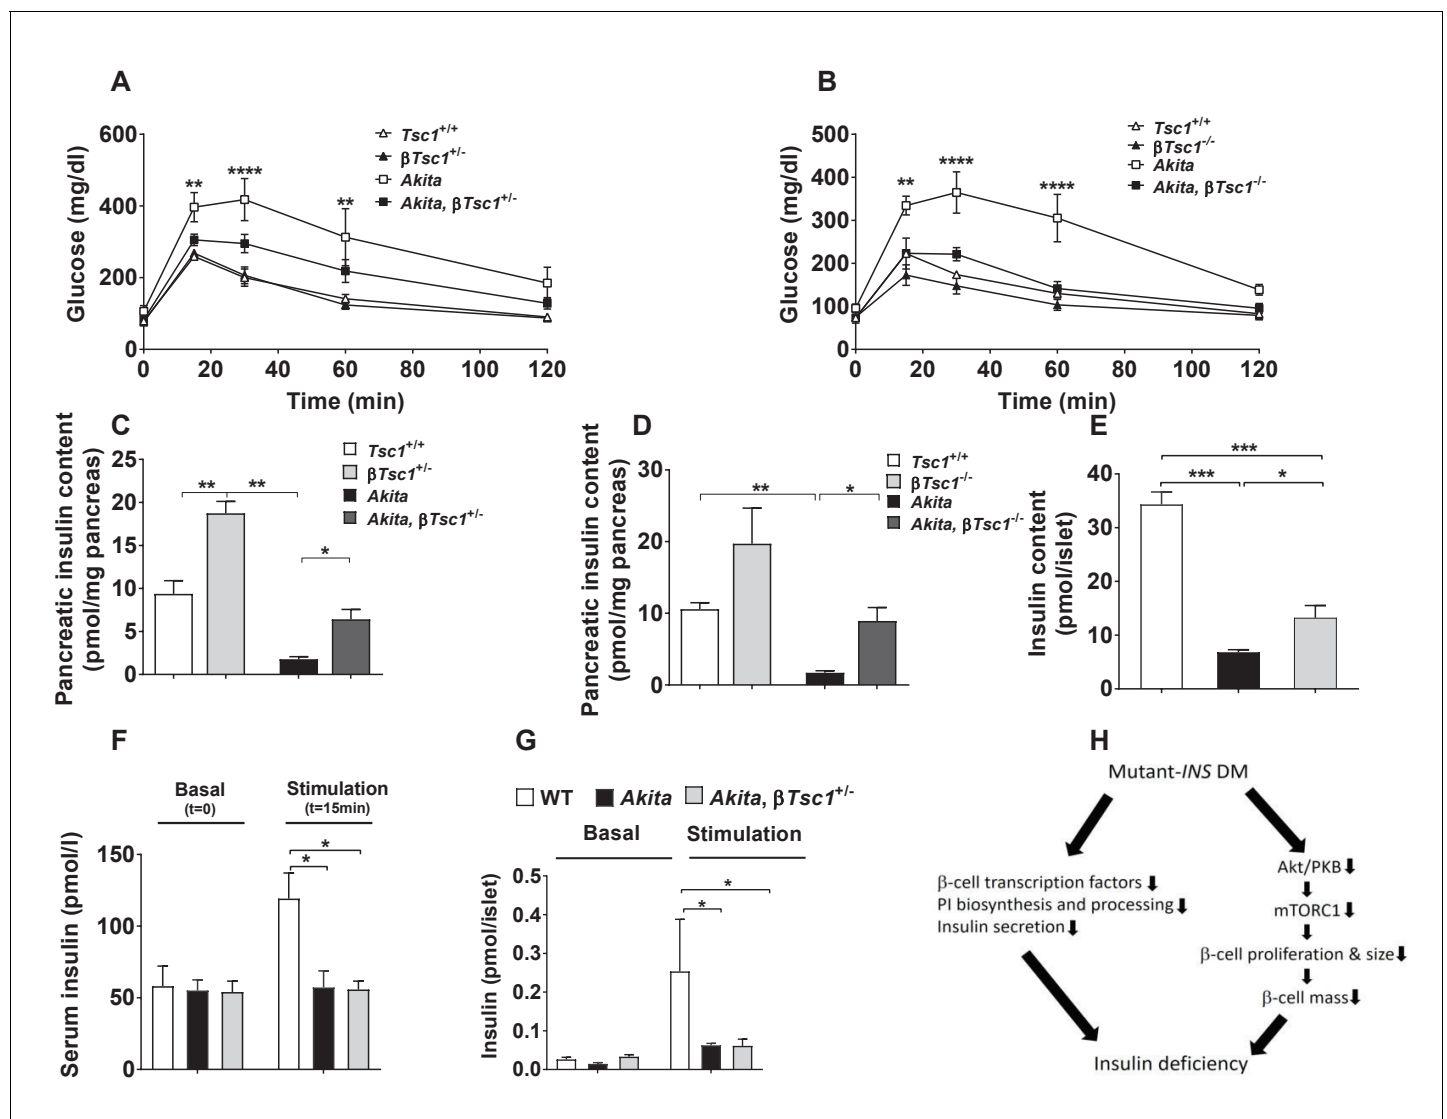

**Figure 10.** Effects of mTORC1 activation in neonate *Akita*  $\beta$ -cells on diabetes. (a–b) IPGTT at P30–35: glucose (1 g/kg) was injected IP after an overnight fast; (a) heterozygous *Tsc1* knockout *Akita* mice (*RIP-Cre:Tsc1<sup>fllox/+</sup>:Akita* (*Akita, βTsc1<sup>+/-</sup>*) and matched controls: *Tsc1<sup>fllox/+</sup>* mice (*Tsc1<sup>+/+</sup>*), *RIP-Cre:Tsc1<sup>fllox/+</sup>* mice (*βTsc1<sup>+/-</sup>*), and *Tsc1<sup>fllox/+</sup>:Akita* (*Akita*) ( $n = 3–5$  mice in each group); (b) homozygous *Tsc1* knockout *Akita* mice (*RIP-Cre:Tsc1<sup>fllox/fllox</sup>:Akita* (*Akita, βTsc1<sup>-/-</sup>*) and matched controls: *Tsc1<sup>fllox/fllox</sup>* mice (*Tsc1<sup>+/+</sup>*), *RIP-Cre:Tsc1<sup>fllox/fllox</sup>* mice (*βTsc1<sup>-/-</sup>*), and *Tsc1<sup>fllox/fllox</sup>:Akita* (*Akita*) ( $n = 3–5$  in each group); (c–d) pancreatic insulin content of heterozygous and homozygous *Tsc1* knockout *Akita* mice and matched controls at P30–35 (WT ( $n = 7$ ), *Akita* ( $n = 11$ ), *Akita, βTsc1<sup>+/-</sup>* ( $n = 3$ ) and *Akita, βTsc1<sup>-/-</sup>* ( $n = 4$ ); (e) islet insulin content. (f–g) Effects of mTORC1 activation in neonate *Akita*  $\beta$ -cells on insulin secretion in vivo and ex vivo. (f) insulin secretion in response to IP glucose injection ( $n = 6$  mice in each group); (g) islets were isolated from *Tsc1<sup>fllox/+</sup>* WT mice (WT), *Tsc1<sup>fllox/+</sup>:Akita* (*Akita*) and *RIP-Cre:Tsc1<sup>fllox/+</sup>:Akita* (*Akita, βTsc1<sup>+/-</sup>*) mice and insulin secretion assessed following static incubations at basal (3.3 mmol/l) and stimulated (16.7) mmol/l glucose. (h) a model of the pathophysiology of permanent neonatal diabetes. \* $p < 0.05$  \*\*,  $p < 0.01$ , \*\*\*,  $p < 0.001$ \*\*\*\*,  $p < 0.0001$ .

DOI: <https://doi.org/10.7554/eLife.38472.019>

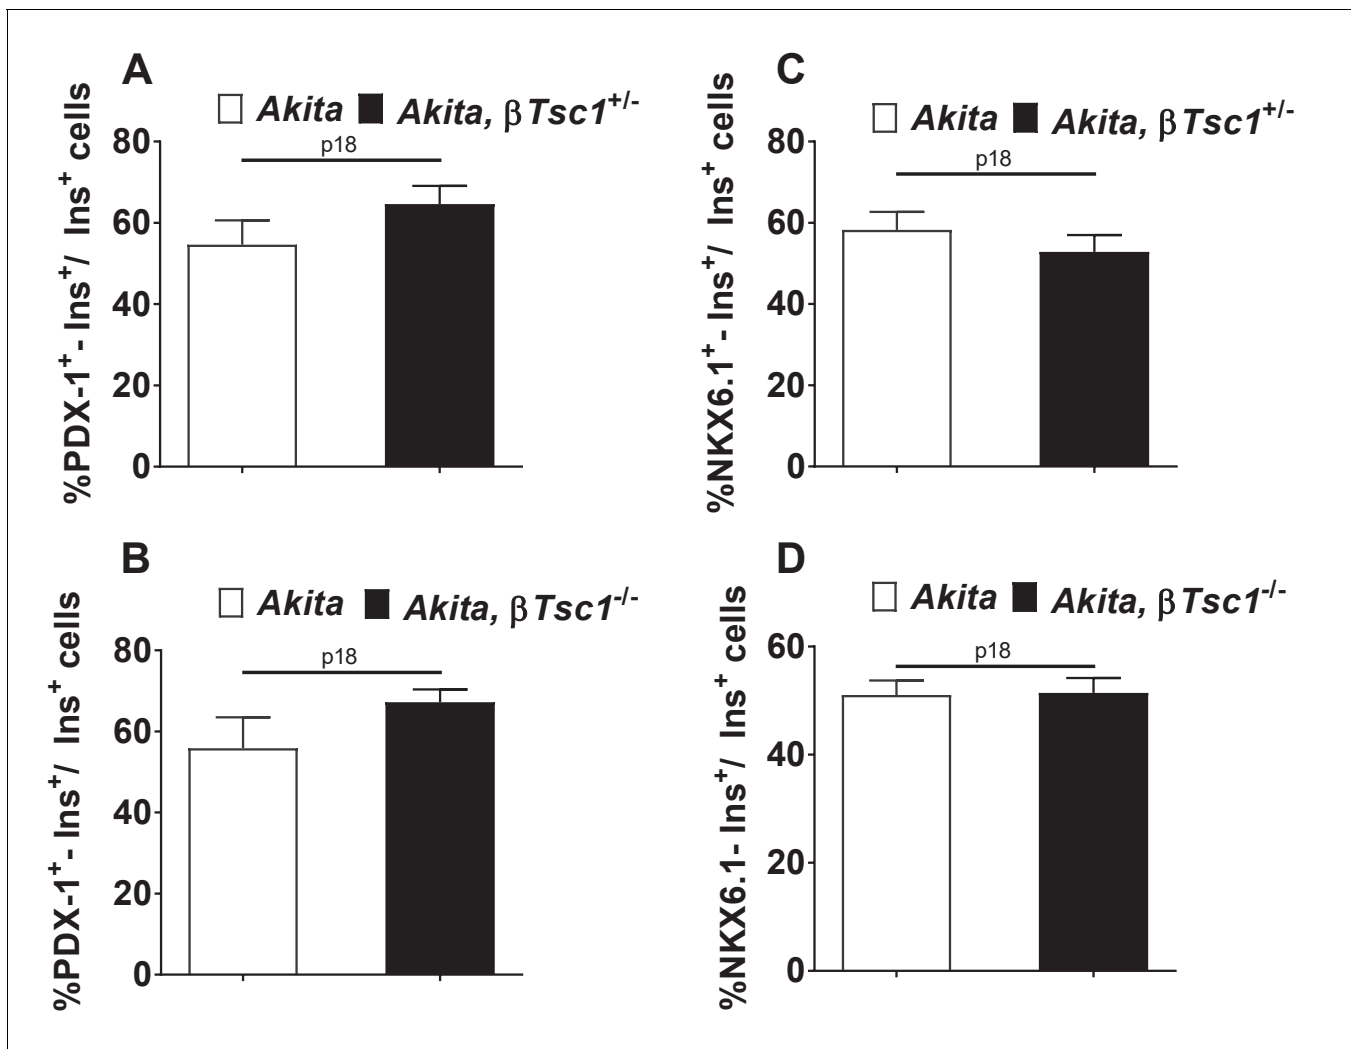

**Figure 10—figure supplement 1.** Effects of mTORC1 activation in *Akita*  $\beta$ -cells on PDX-1 (a, b) and NKX6.1 expression (c, d). Heterozygous (a, c) and homozygous (b, d)  $\beta Tsc1$  knockout *Akita* and age-matched controls were sacrificed at P18. Pancreatic sections were stained for insulin and PDX-1 (*Akita* (n = 1760  $\beta$ -cells); *Akita, βTsc1<sup>+/-</sup>* (n = 814  $\beta$ -cells); *Akita, βTsc1<sup>-/-</sup>* (n = 1458  $\beta$ -cells) or NKX6.1 (*Akita* (n = 1500  $\beta$ -cells); *Akita, βTsc1<sup>+/-</sup>* (n = 1438  $\beta$ -cells); *Akita, βTsc1<sup>-/-</sup>* (n = 1584  $\beta$ -cells)).

DOI: <https://doi.org/10.7554/eLife.38472.020>

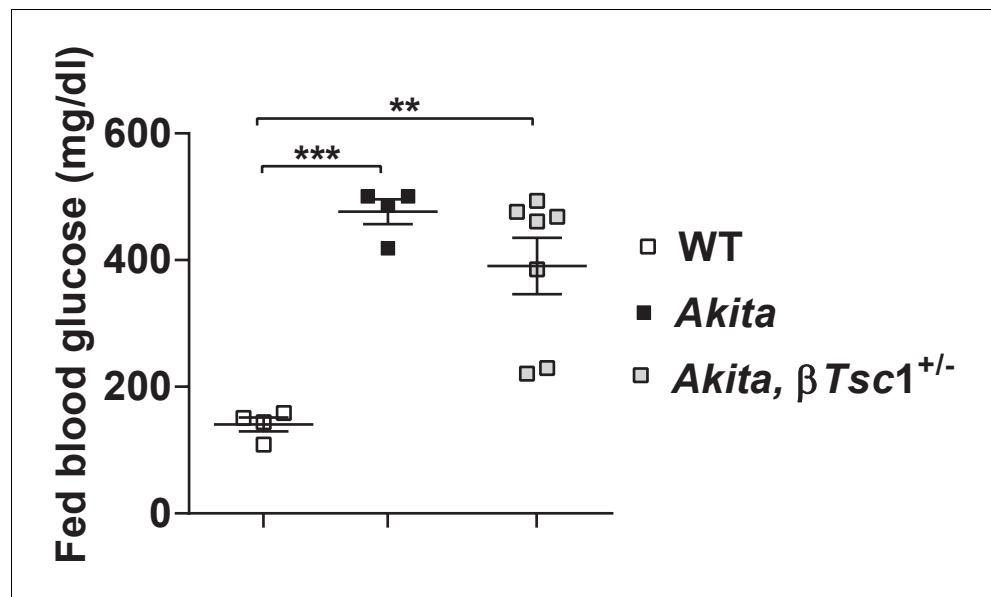

**Figure 10—figure supplement 2.** Fed blood glucose of  $Tsc1^{fllox/+}$  mice (WT),  $Tsc1^{fllox/+}$ :Akita (Akita) and heterozygous  $Tsc1$  knockout  $RIP-Cre:Tsc1^{fllox/+}$ :Akita ( $Akita, \beta Tsc1^{+/-}$ ) mice at the age of 2–3 months. Blood glucose levels are the mean of the last three consecutive glucose measurements.  
\*\* $p < 0.01$ , \*\*\* $p < 0.001$ .

DOI: <https://doi.org/10.7554/eLife.38472.021>
