# Supplementary figures and images for: Inhibition of mTORC1 by ER stress impairs neonatal β-cell expansion and predisposes to diabetes in the Akita mouse
Source: eLife journal article supplement (doi:10.7554/elife.38472), 2018-11-09

# Riahi et al., Figure 10- figure supplement 1

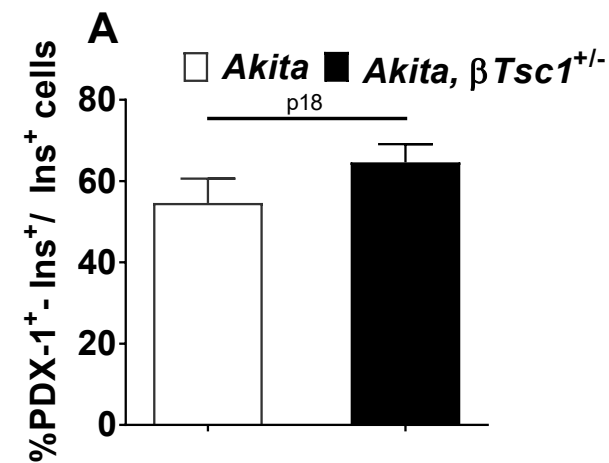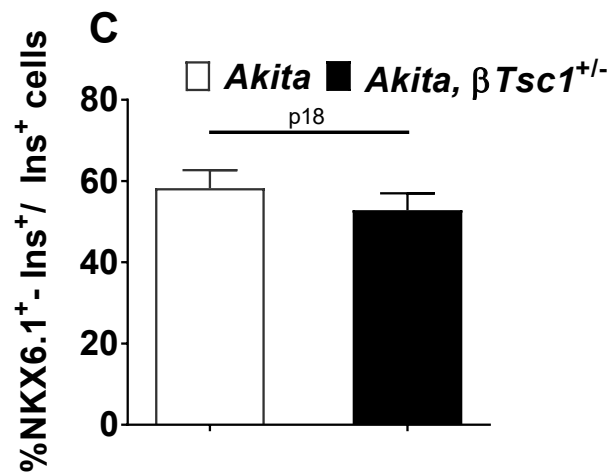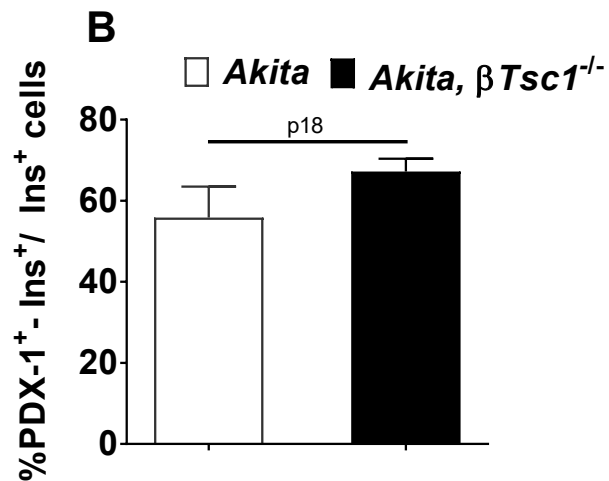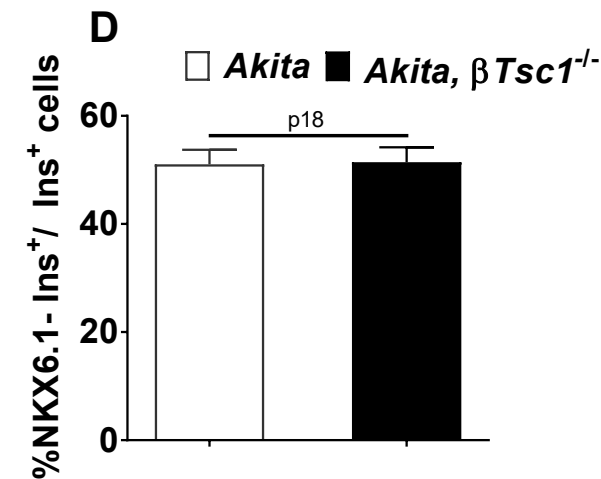

Supplement: supp [file elife_poa_e38472_Figure10_figure_supplement_1.pdf › elife_poa_e38472_Figure10_figure_supplement_1.pdf]

**Riahi *et al.*, Figure 10- figure supplement 2**

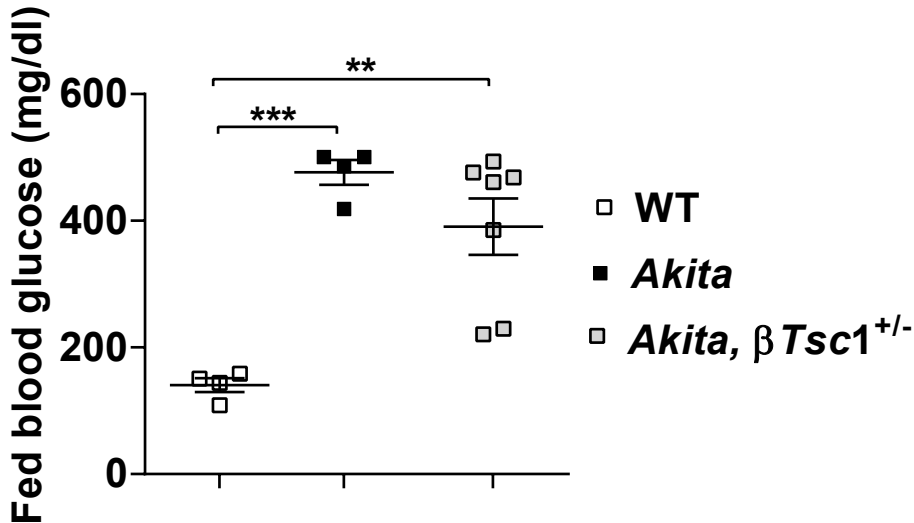

Supplement: supp [file elife_poa_e38472_Figure_10_figure_supplement_2.pdf › elife_poa_e38472_Figure_10_figure_supplement_2.pdf]

Riahi et al., Figure 1- figure supplement 1

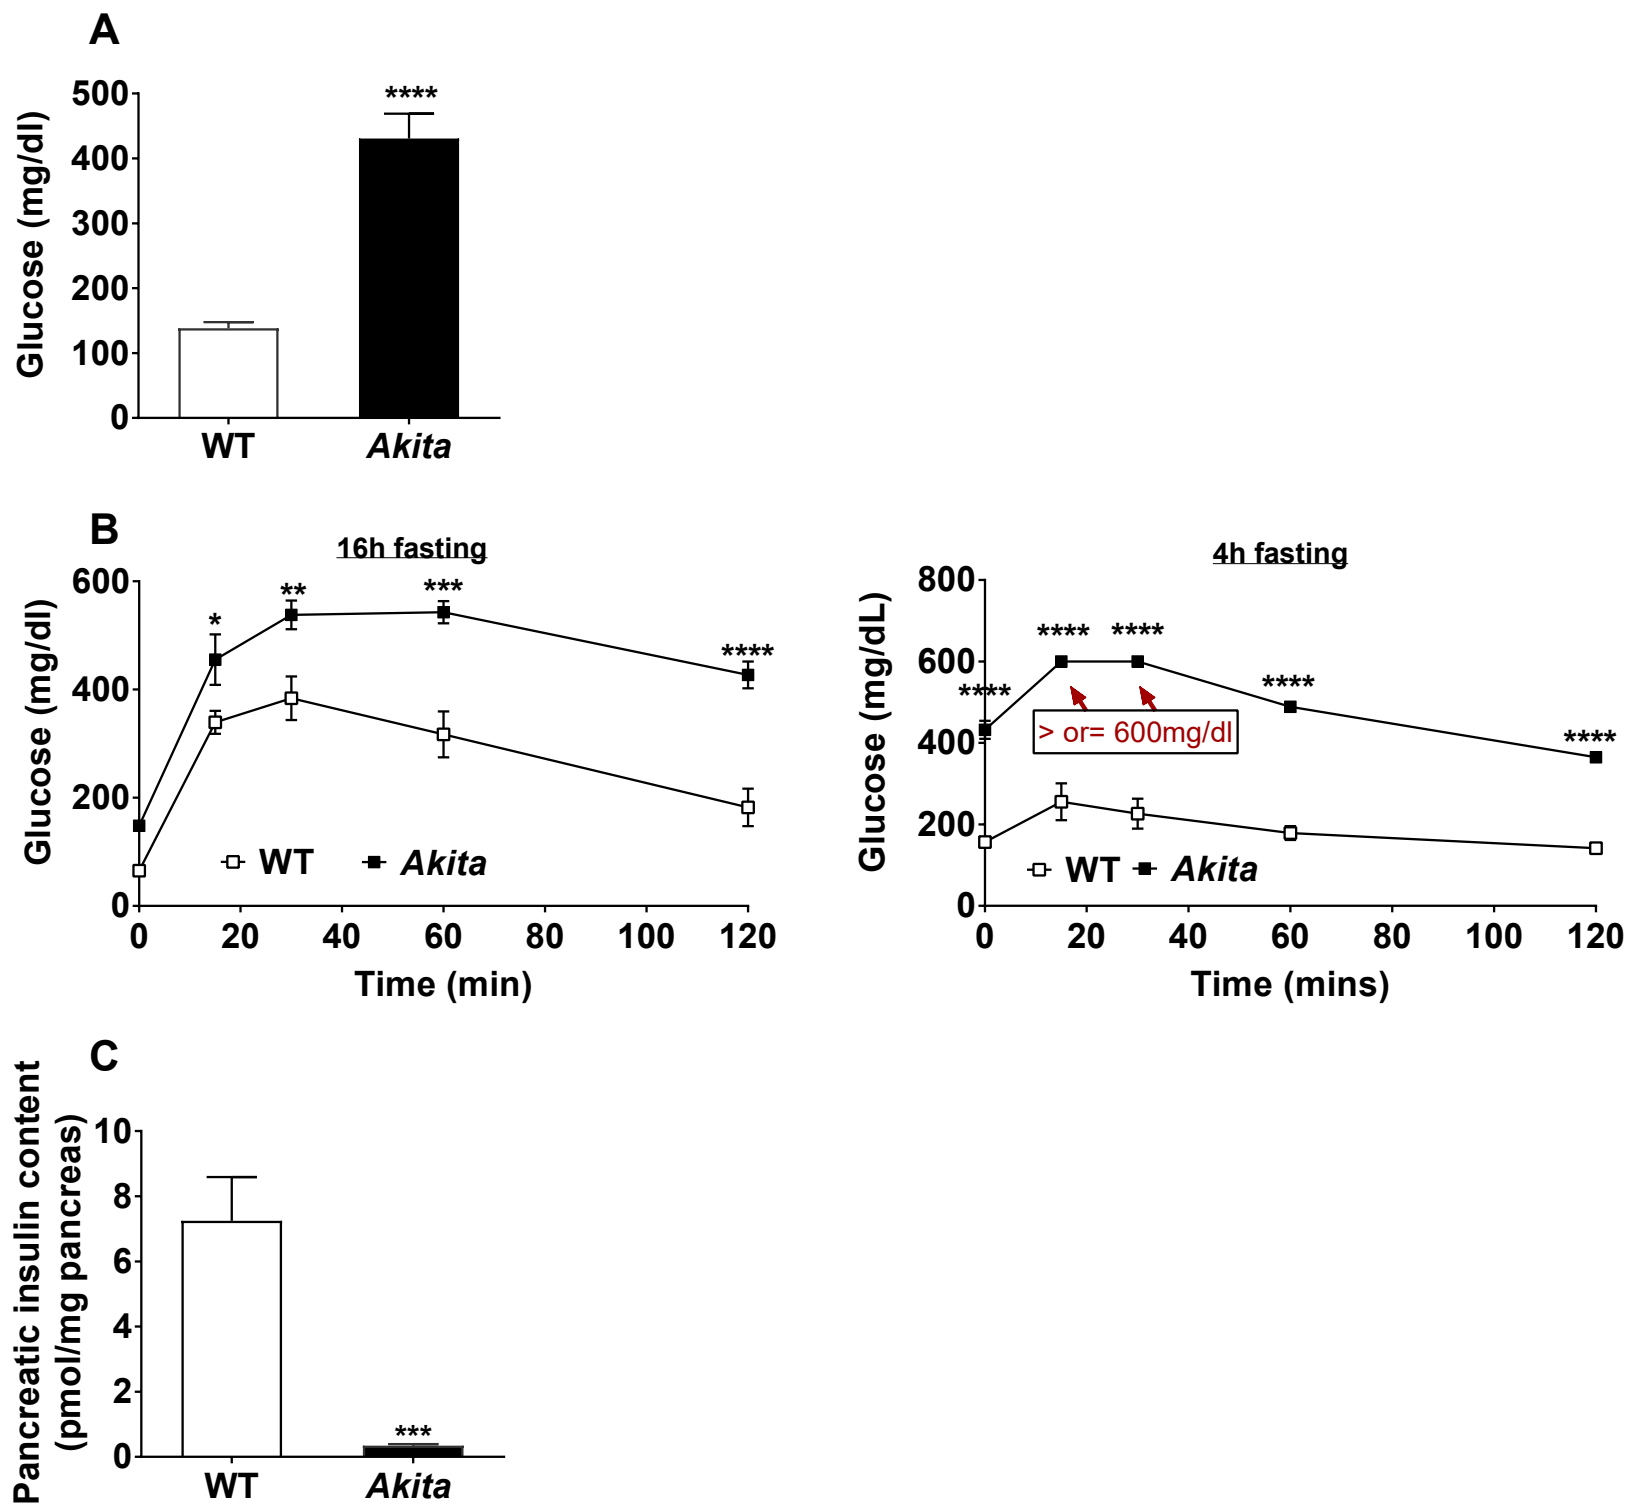

Supplement: supp [file elife_poa_e38472_Figure_1_figure_supplement_1.pdf › elife_poa_e38472_Figure_1_figure_supplement_1.pdf]

Riahi *et al.*, Figure 1- figure supplement 2

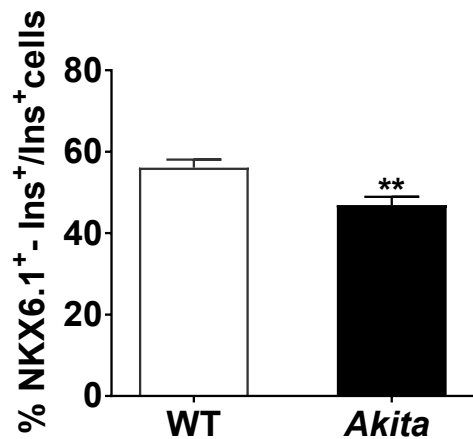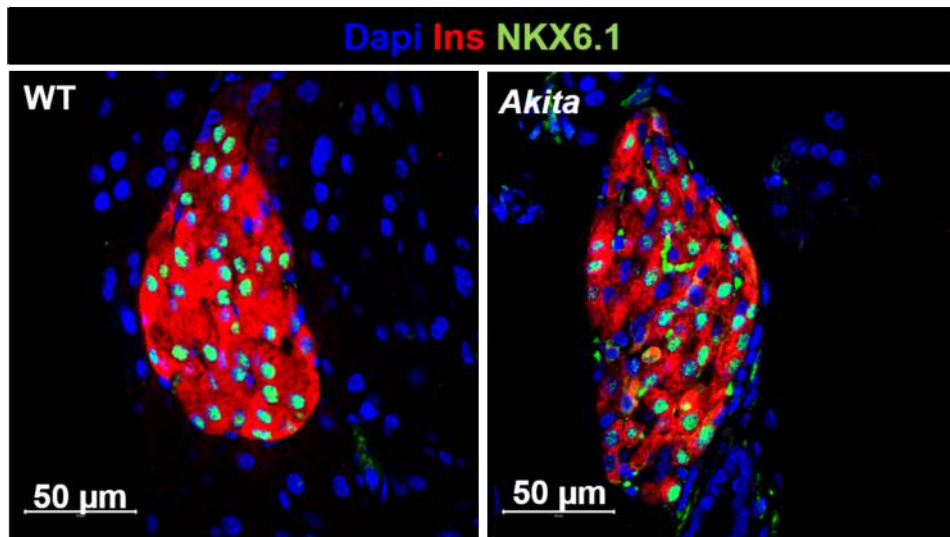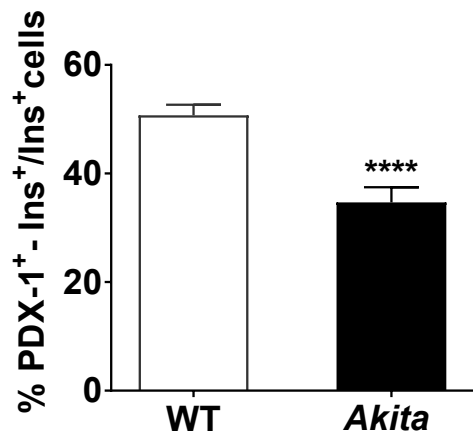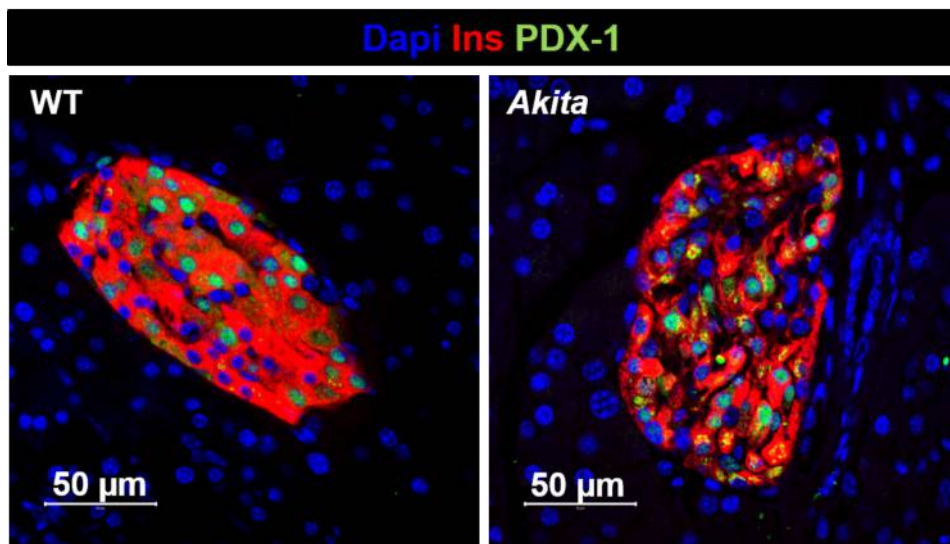

Supplement: supp [file elife_poa_e38472_Figure_1_figure_supplement_2.pdf › elife_poa_e38472_Figure_1_figure_supplement_2.pdf]

# Riahi *et al.*, Figure 4- figure supplement 1

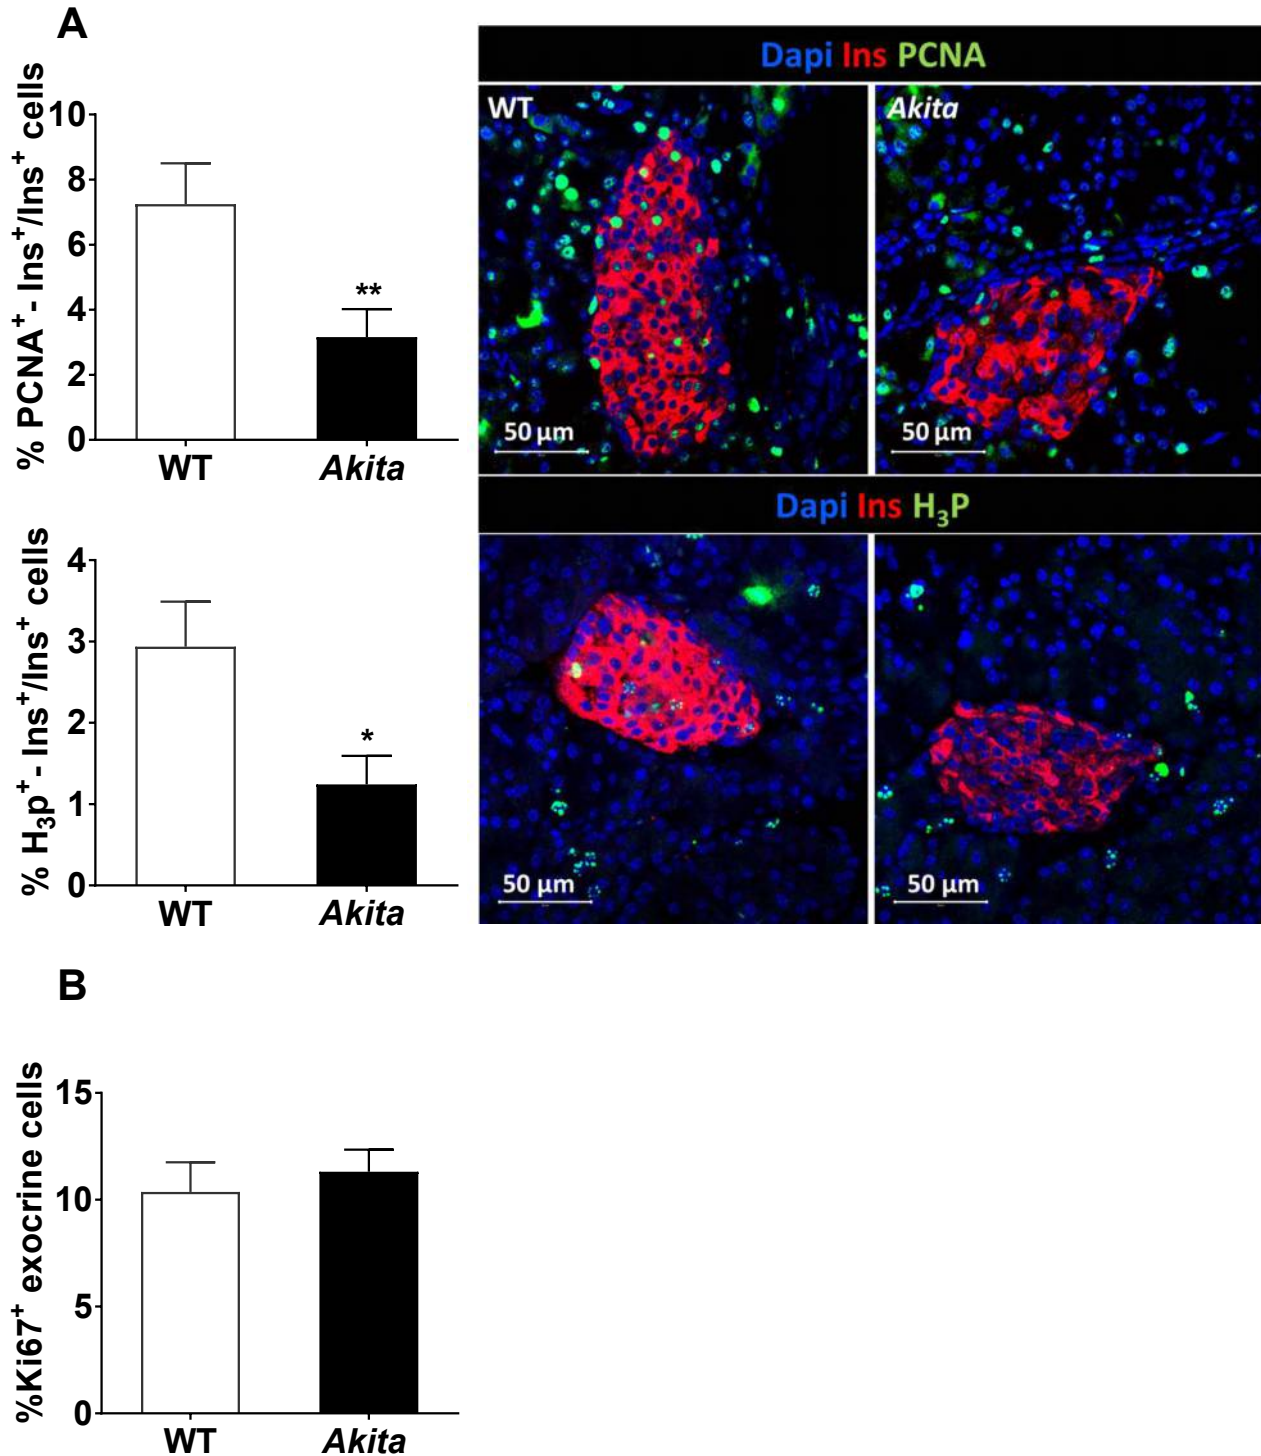

Supplement: supp [file elife_poa_e38472_Figure_4_figure_supplement_1.pdf › elife_poa_e38472_Figure_4_figure_supplement_1.pdf]

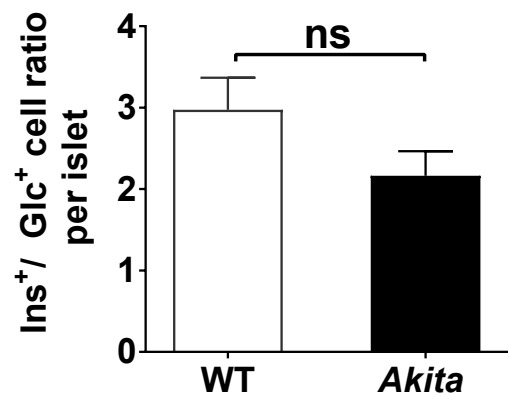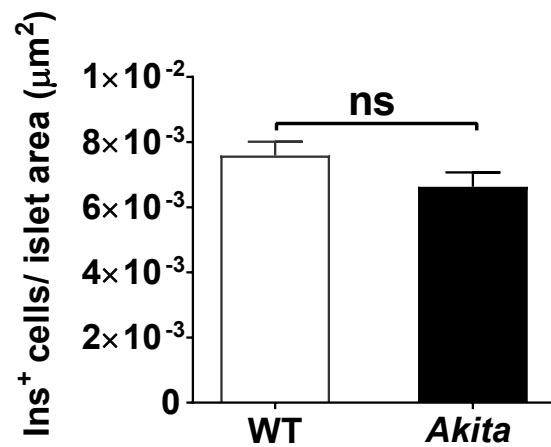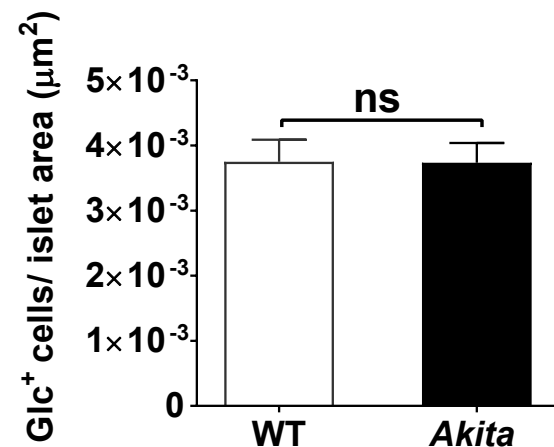

Supplement: supp [file elife_poa_e38472_Figure_5_figure_supplement_1.pdf › elife_poa_e38472_Figure_5_figure_supplement_1.pdf]

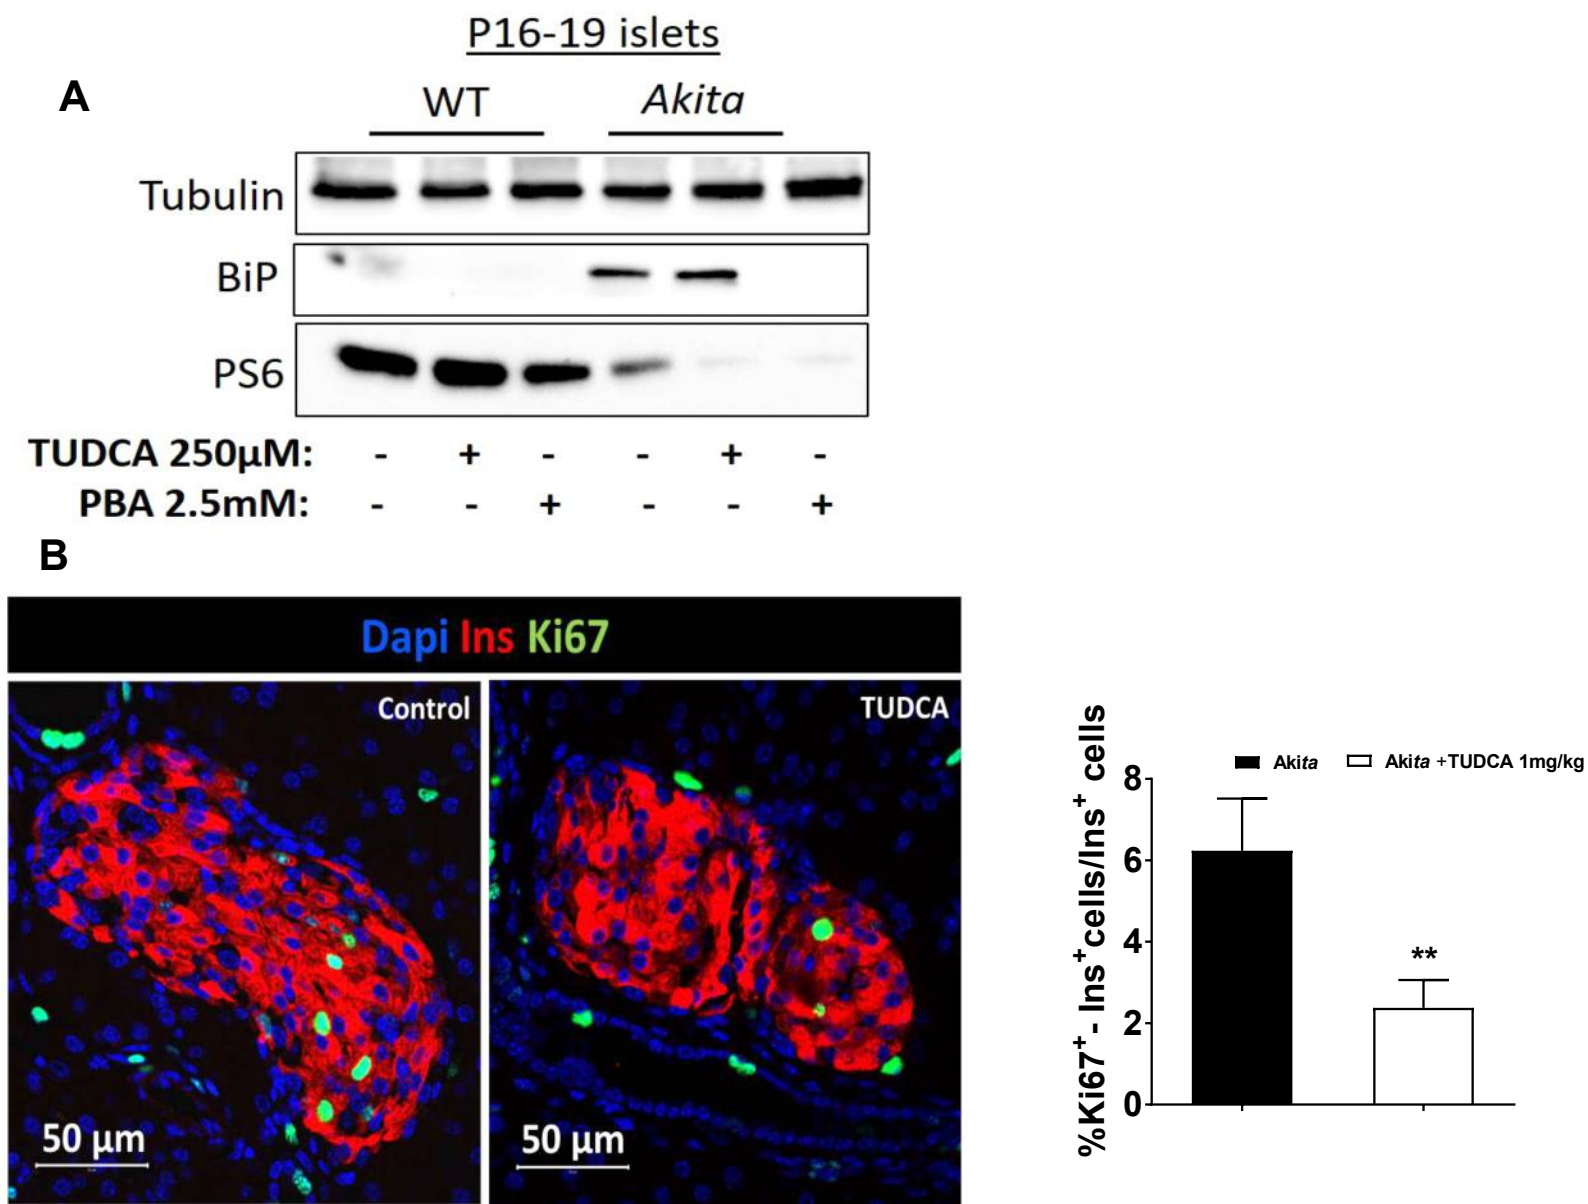

Supplement: supp [file elife_poa_e38472_Figure_8_figure_supplement_1.pdf › elife_poa_e38472_Figure_8_figure_supplement_1.pdf]

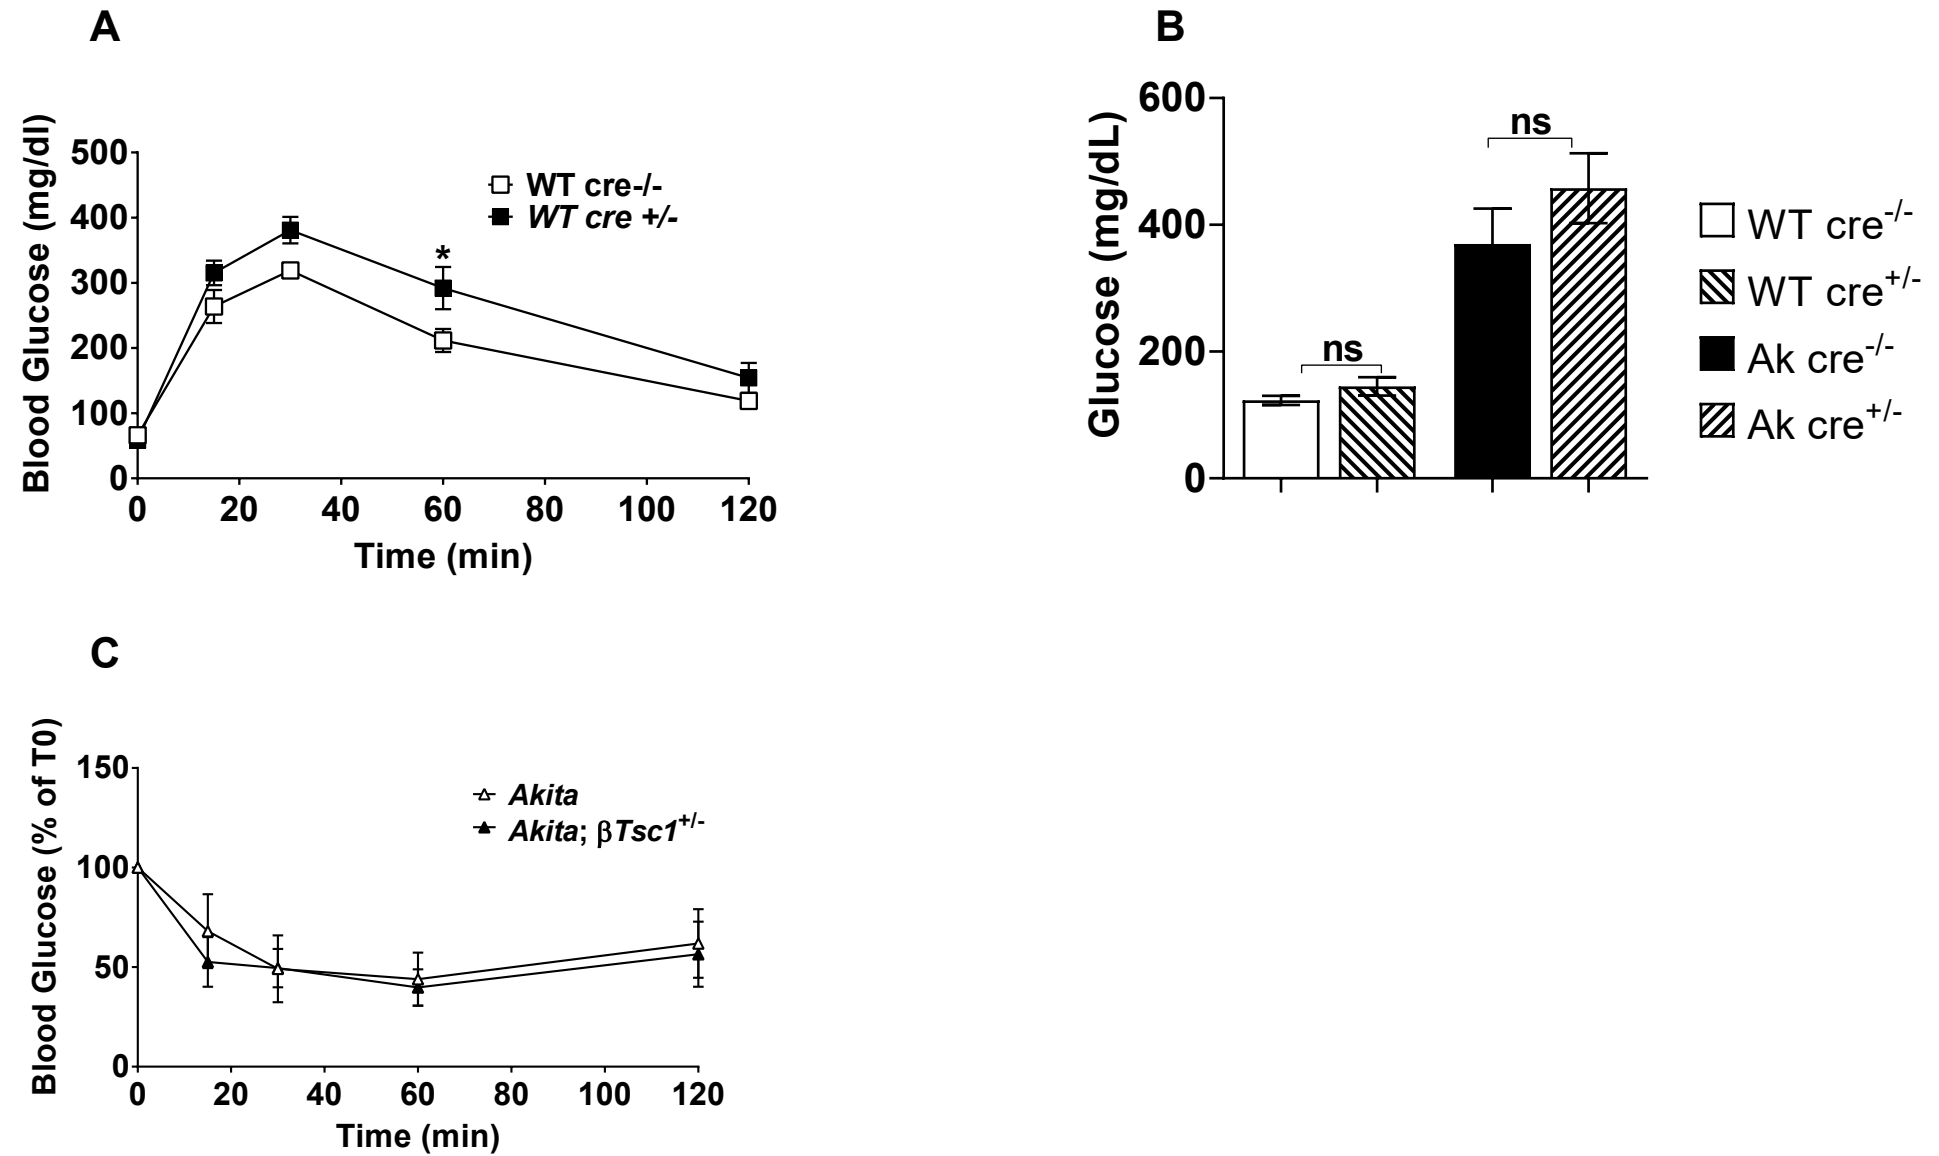

Supplement: supp [file elife_poa_e38472_Figure_9_figure_supplement_1.pdf › elife_poa_e38472_Figure_9_figure_supplement_1.pdf]
